# Supplementary figures and images for: Concise synthesis of the C-1–C-12 fragment of amphidinolides T1–T5
Source: Royal Society of Chemistry journal article supplement (doi:10.1039/c1ob05130j), 2011-01-01

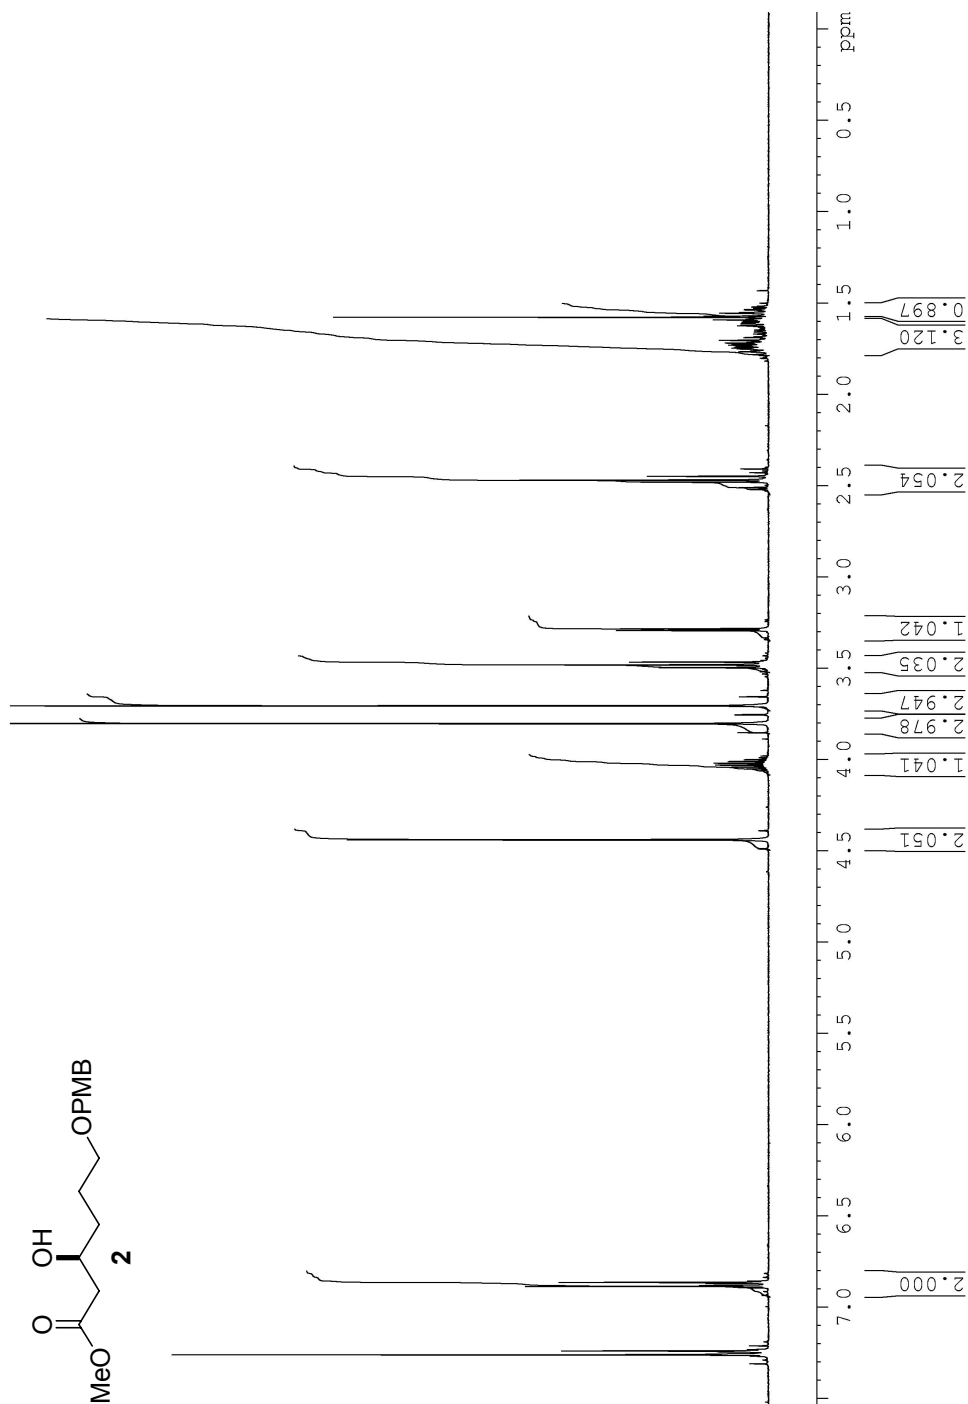

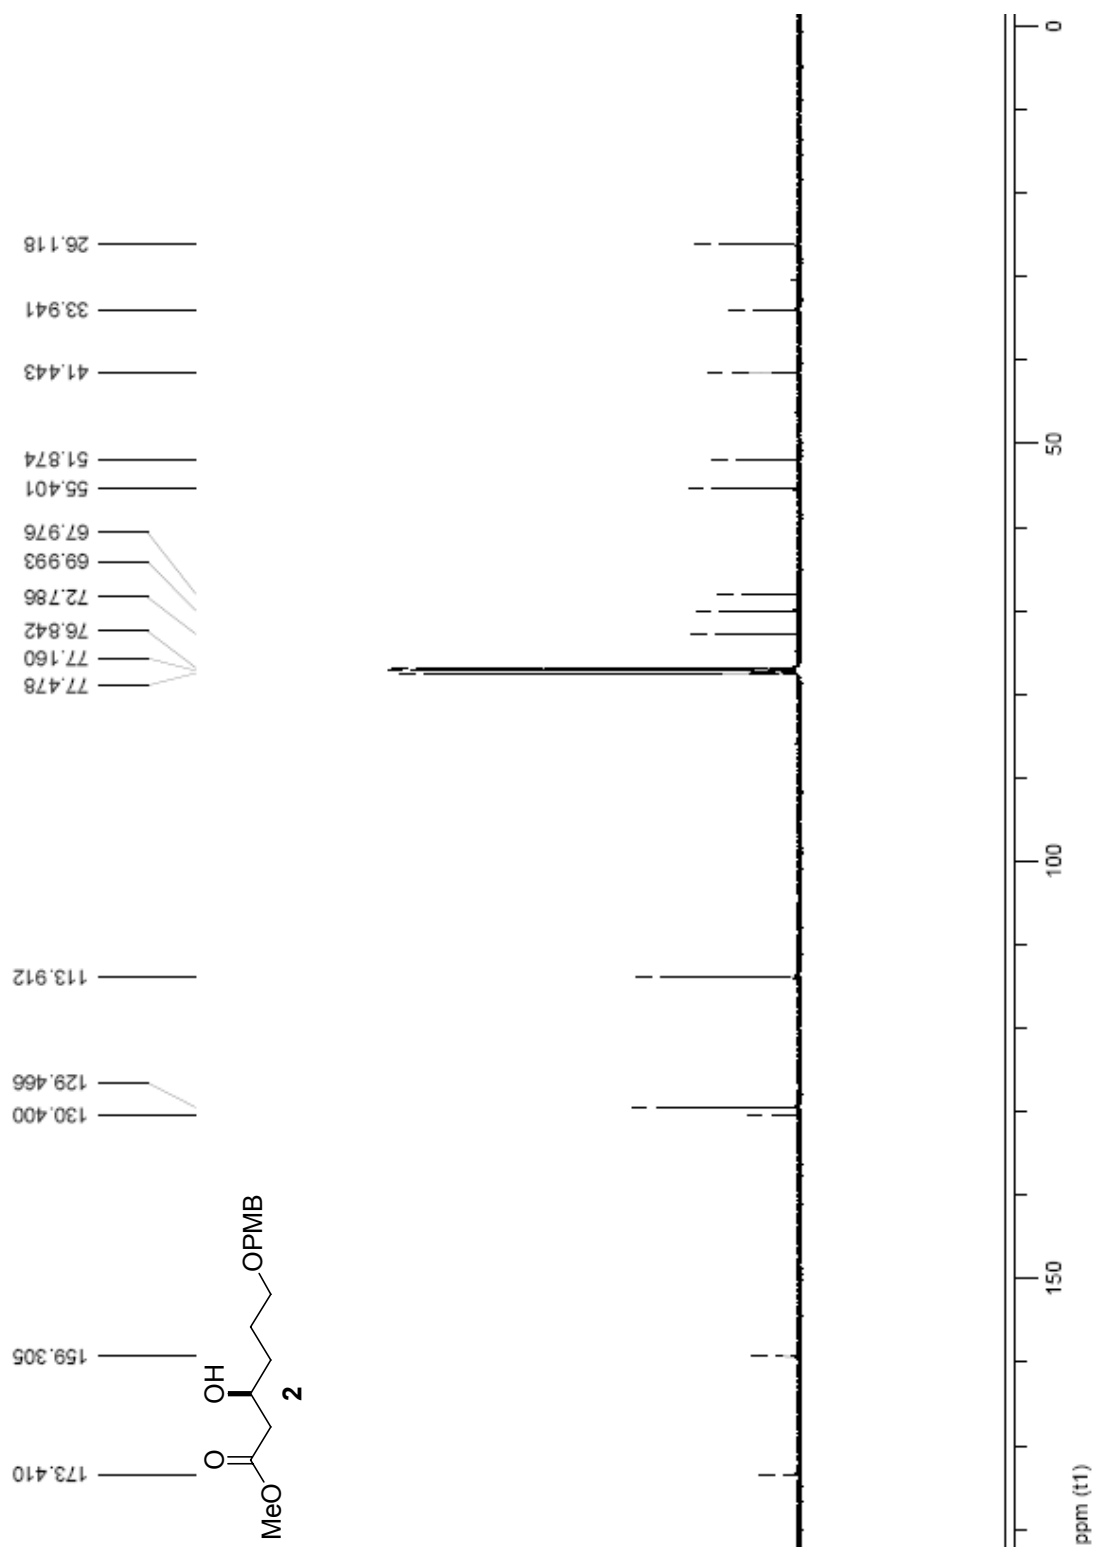

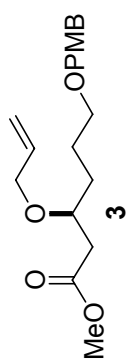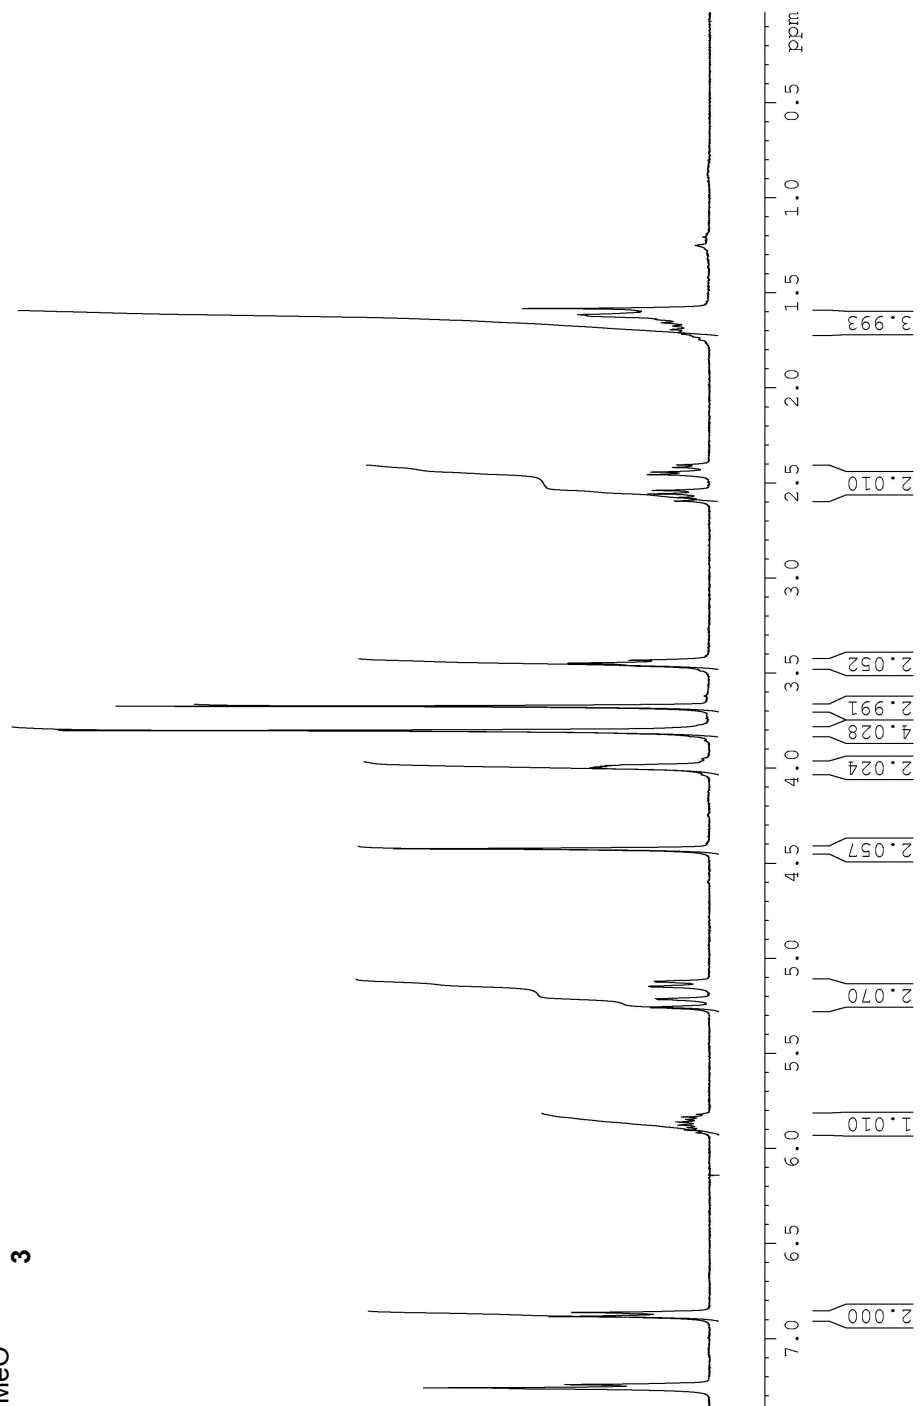

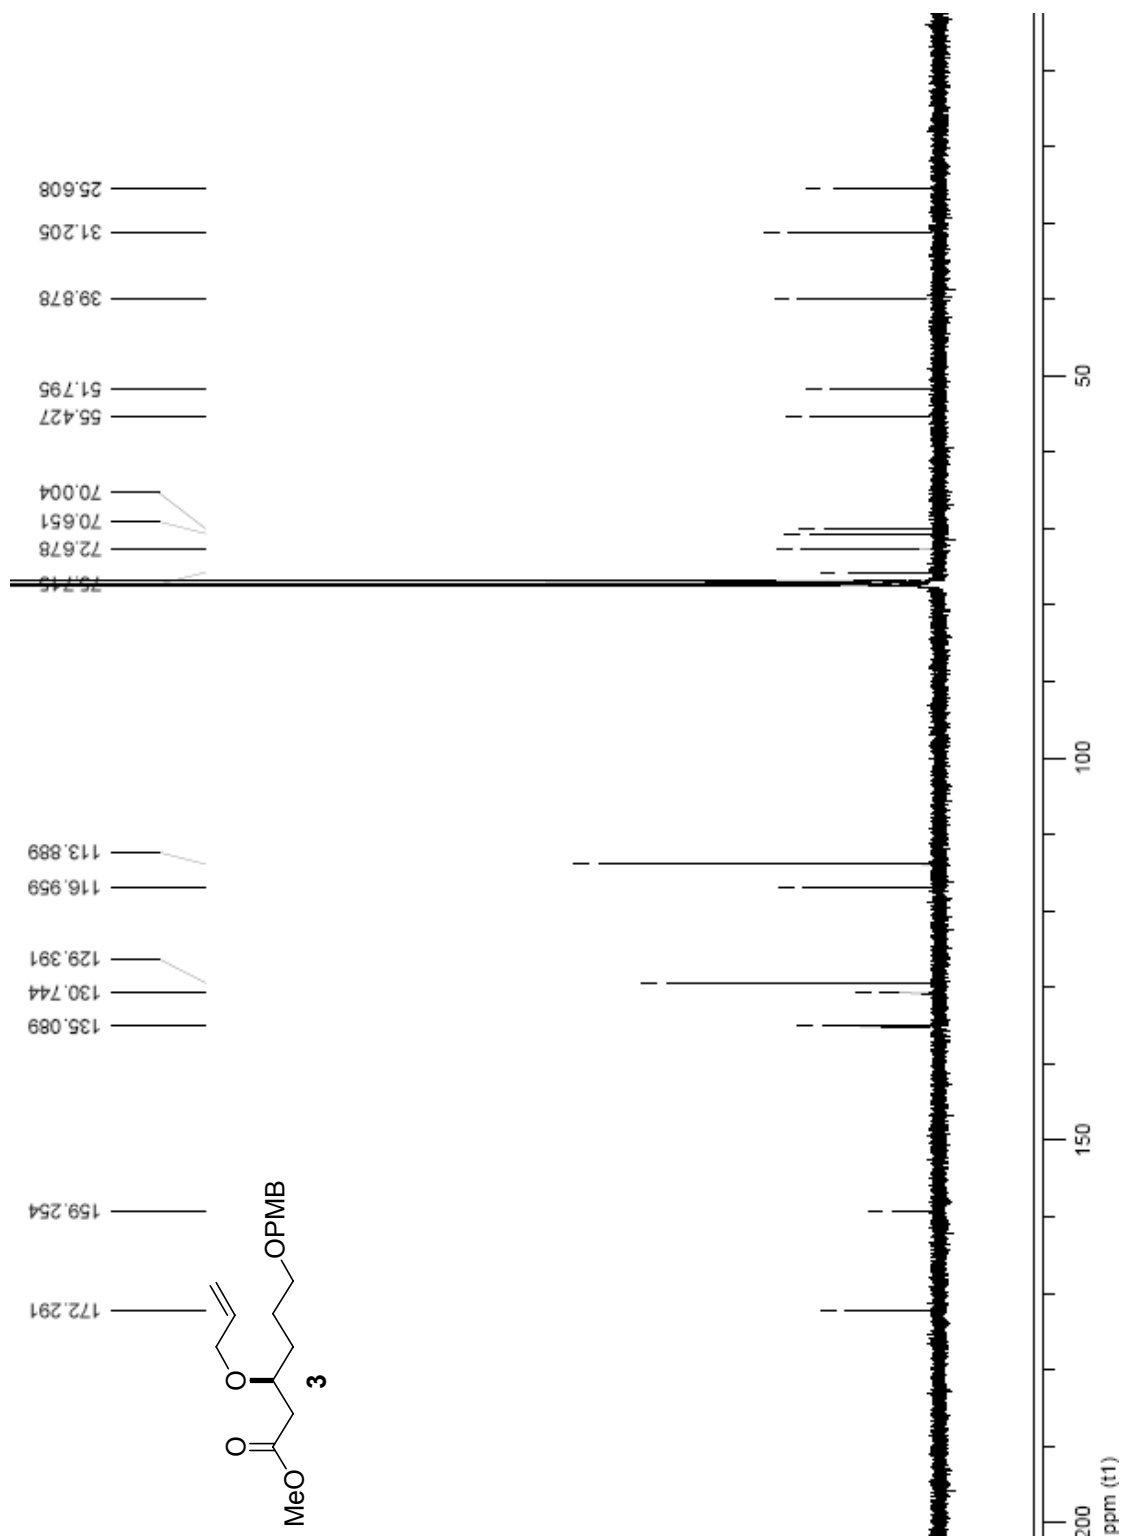

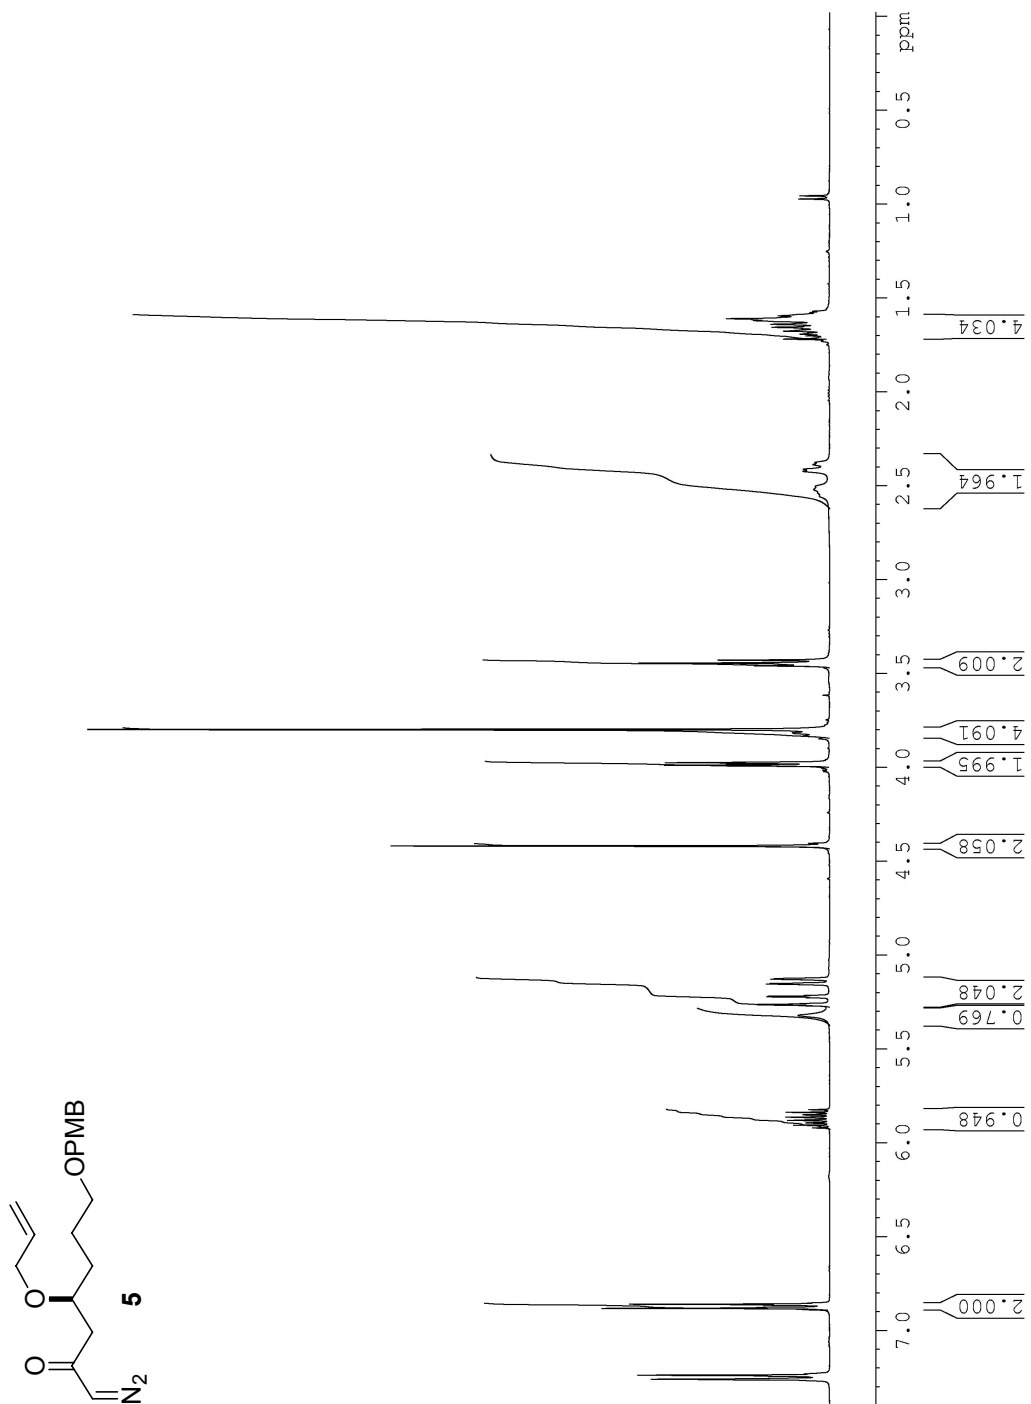

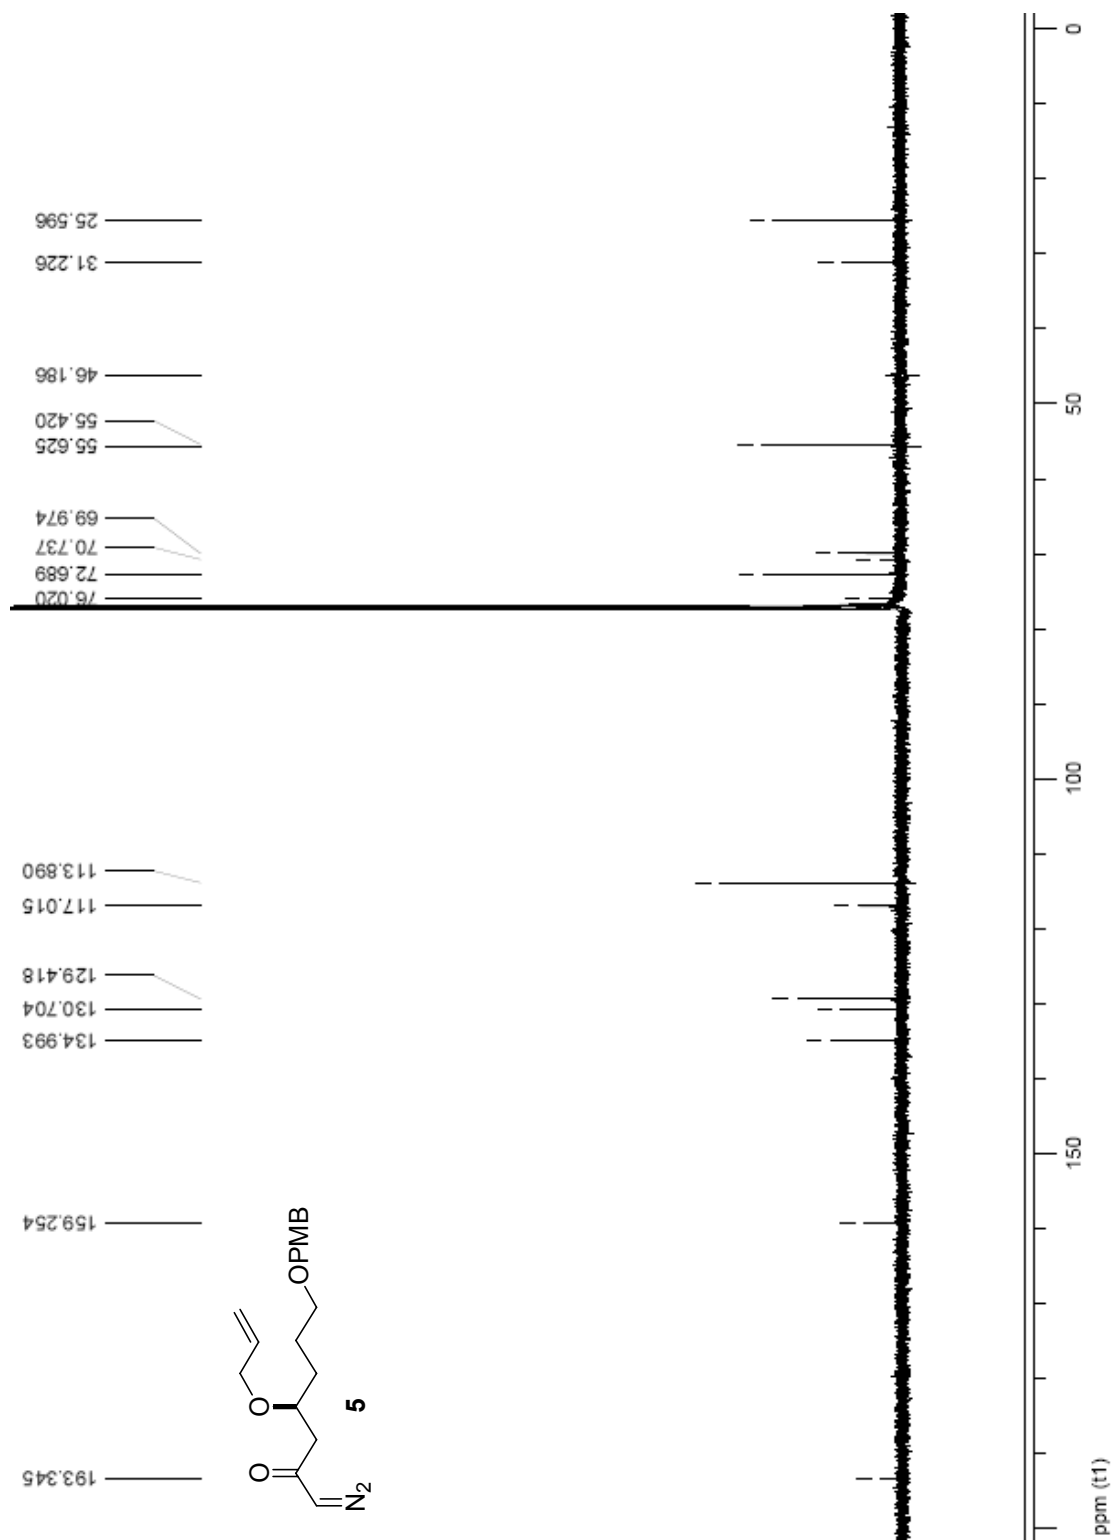

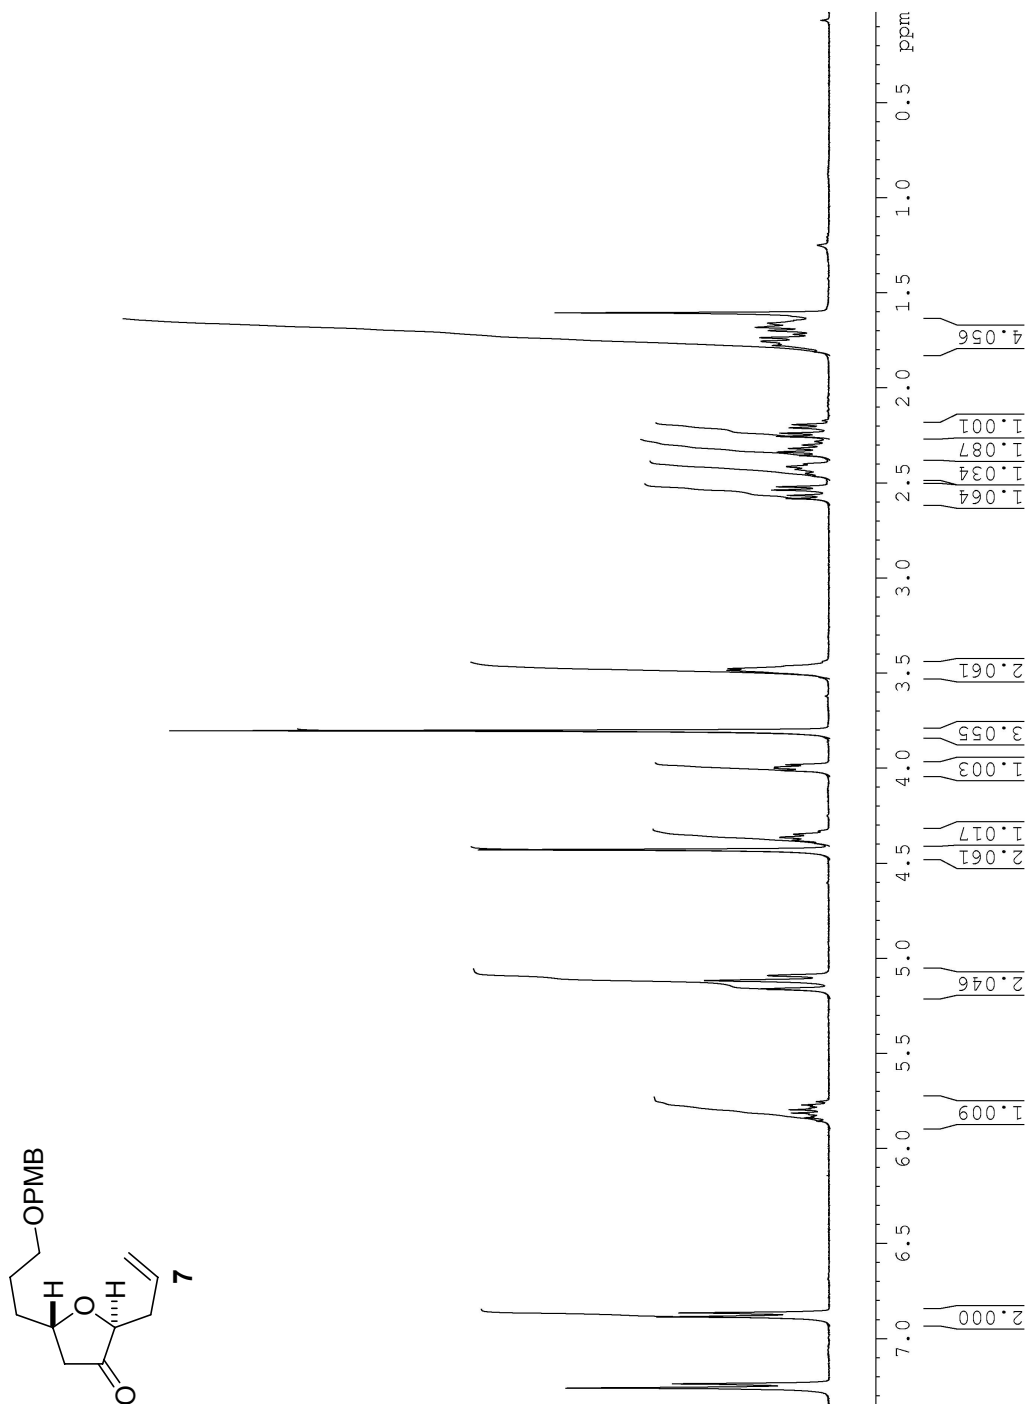

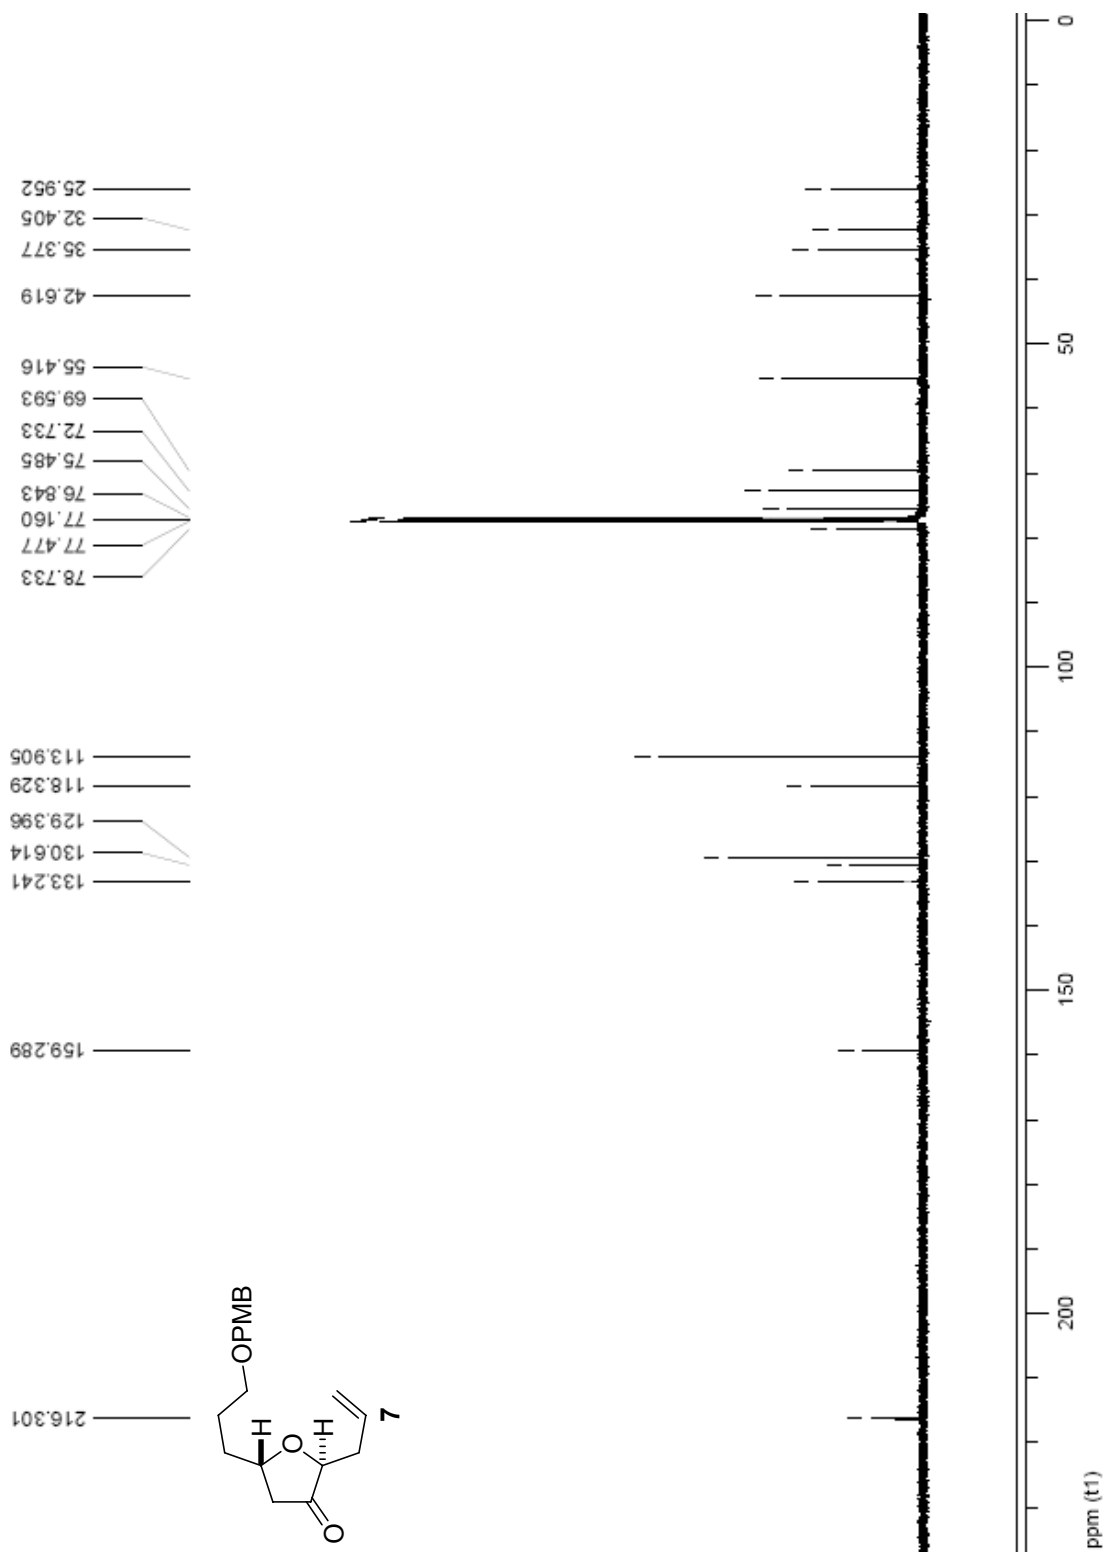



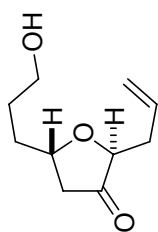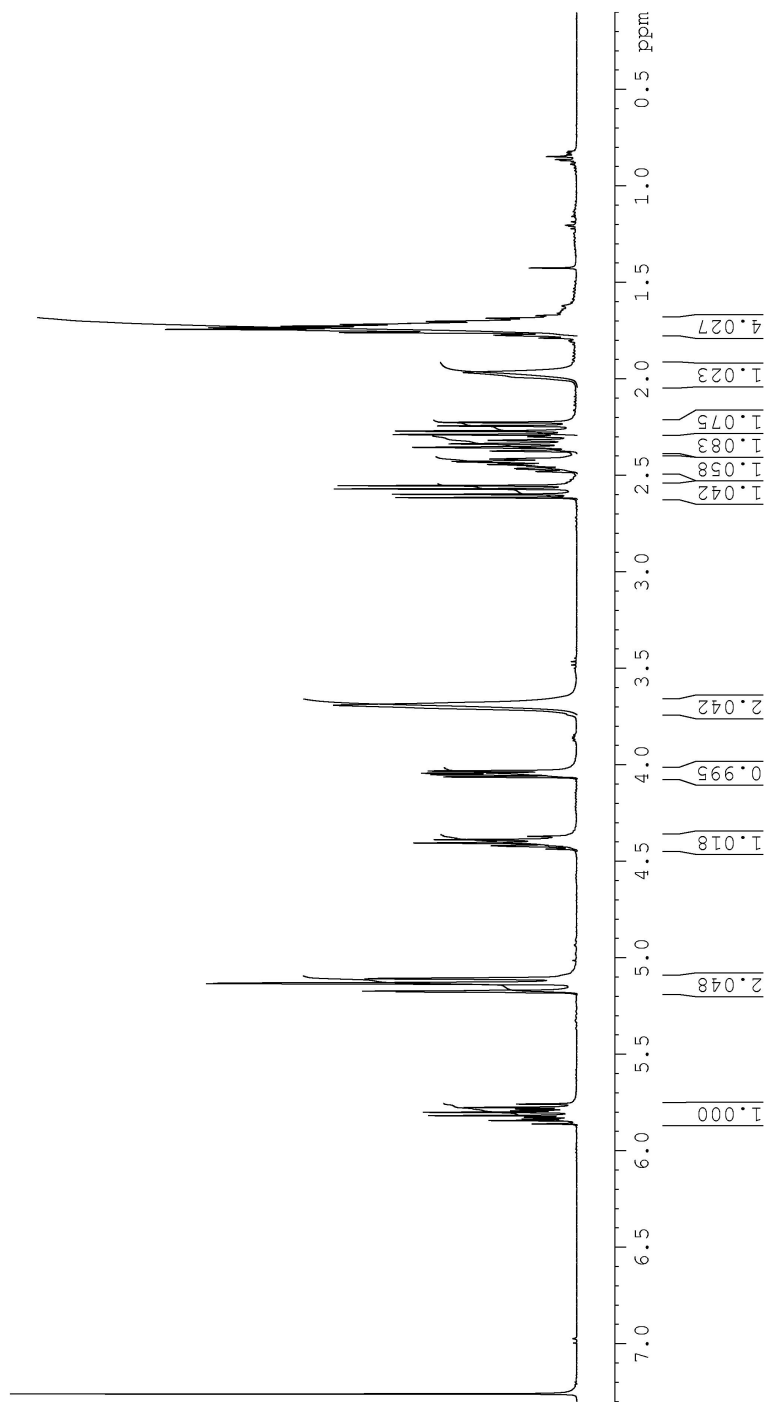

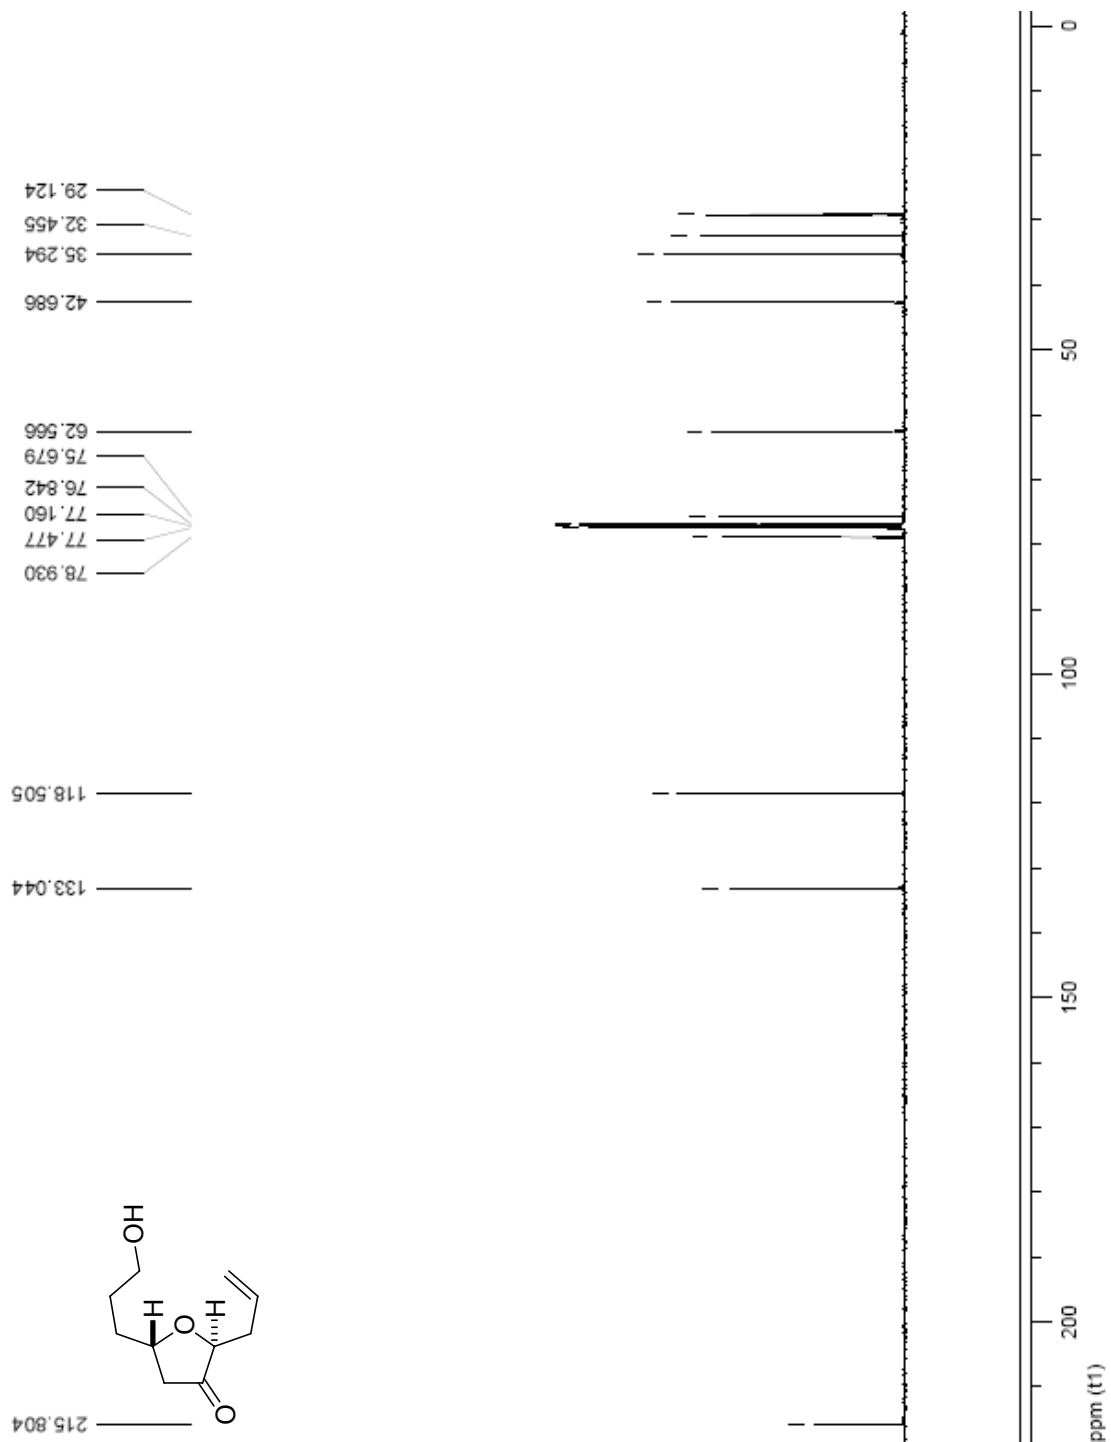

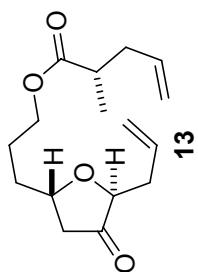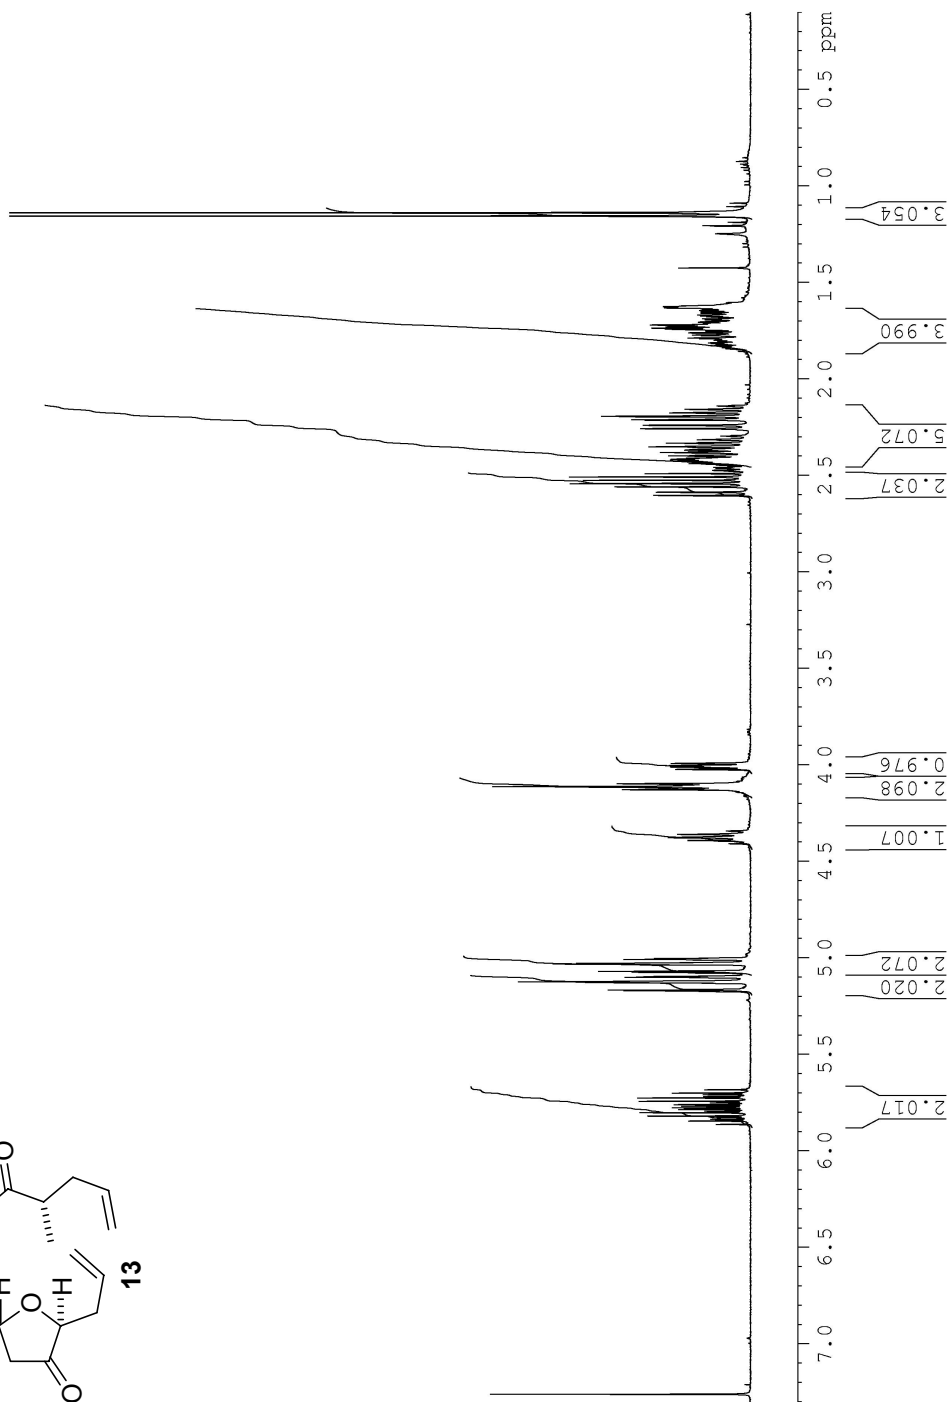

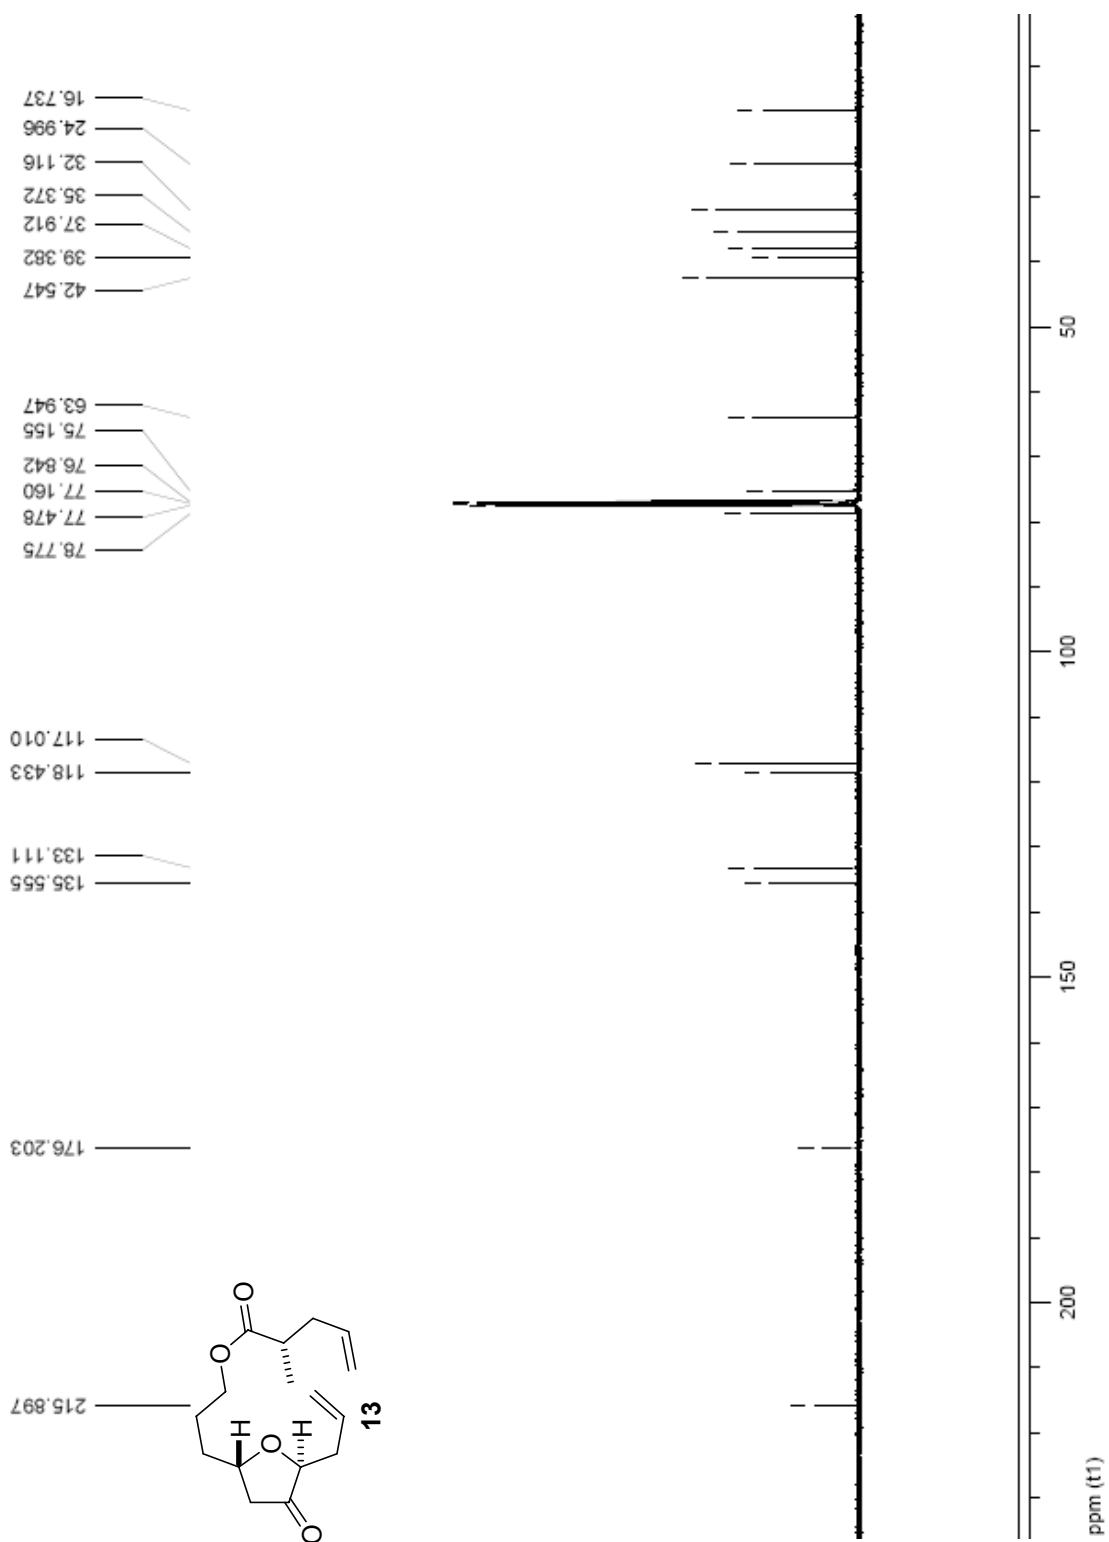

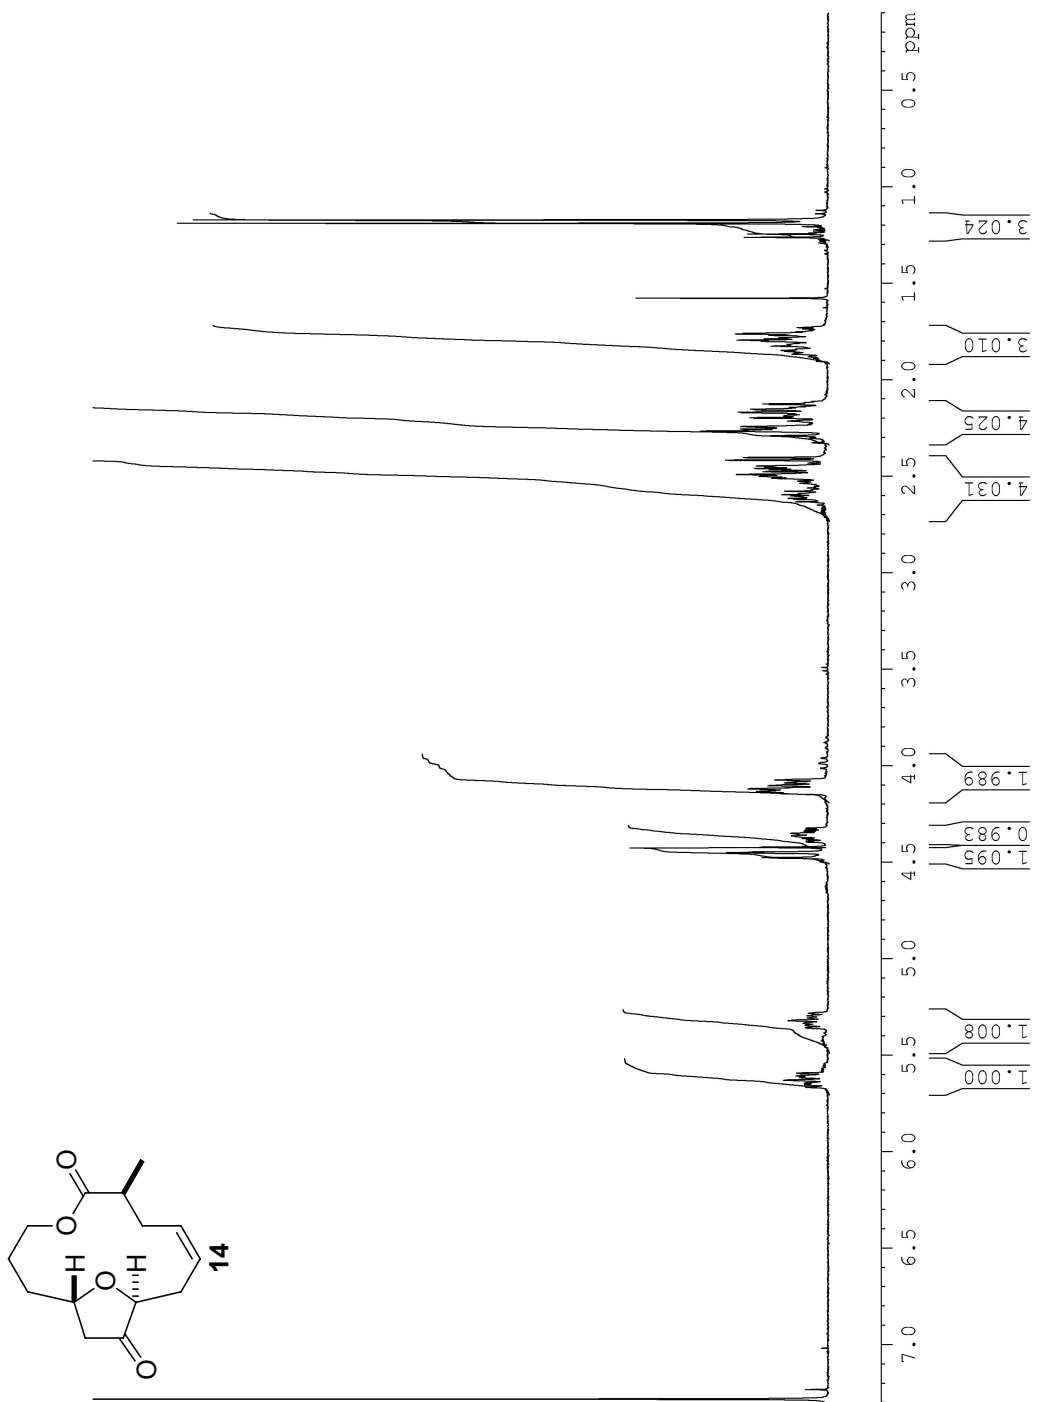

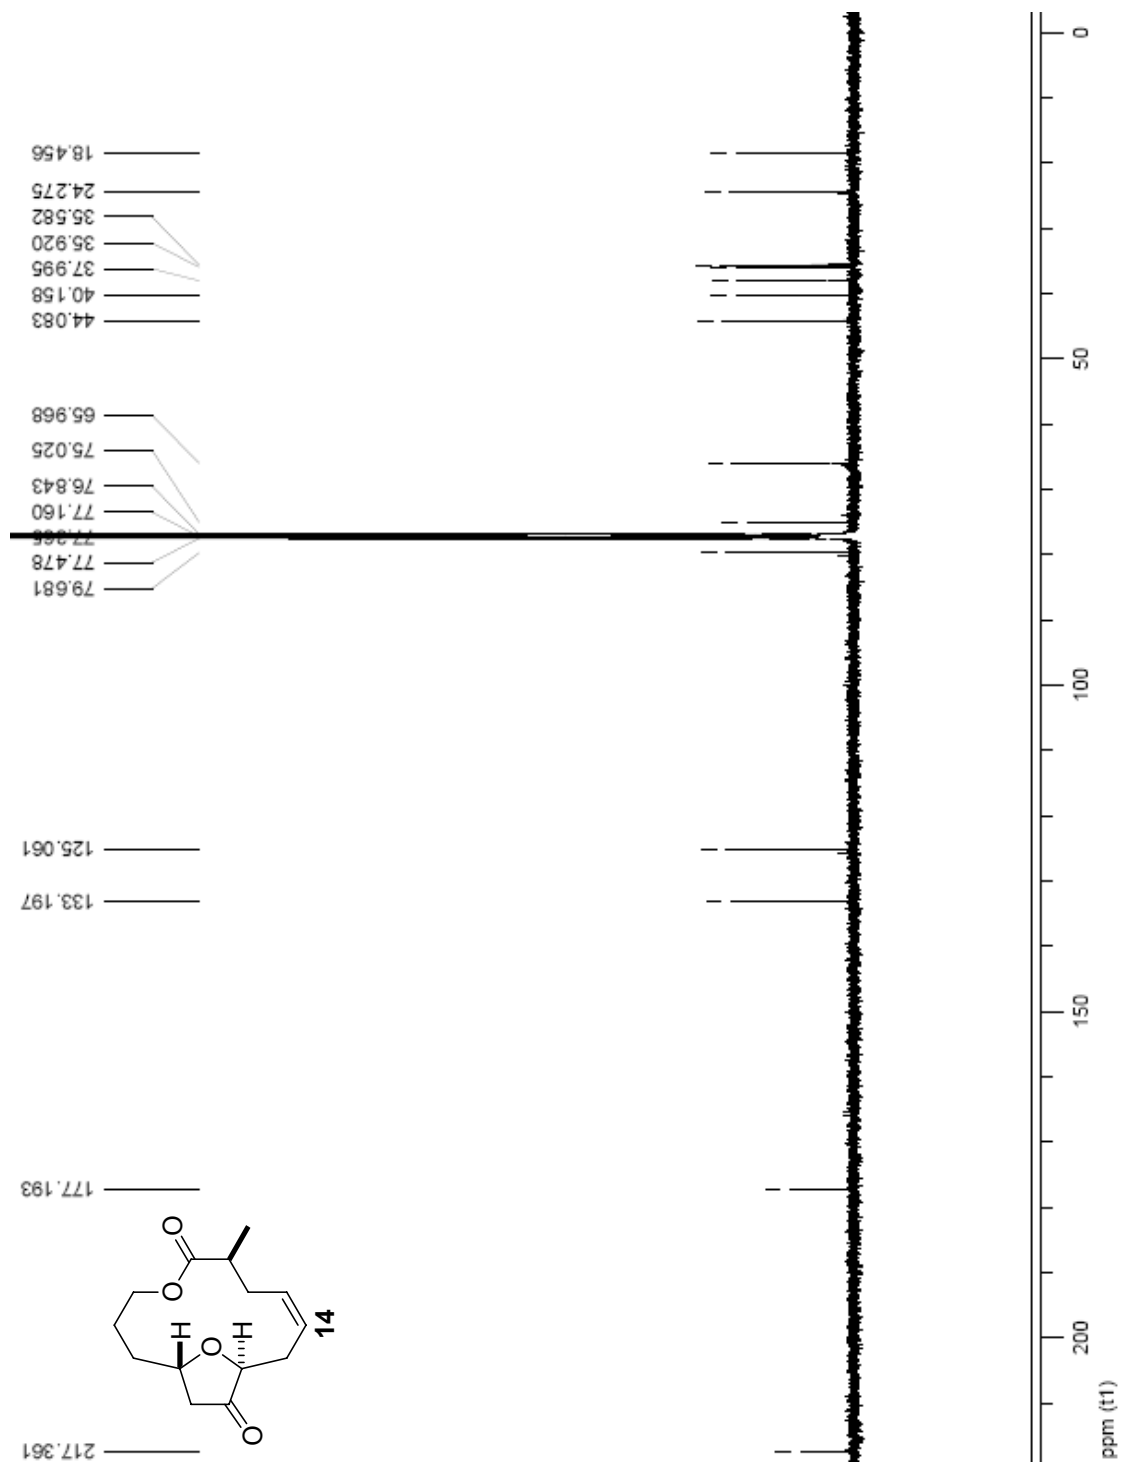

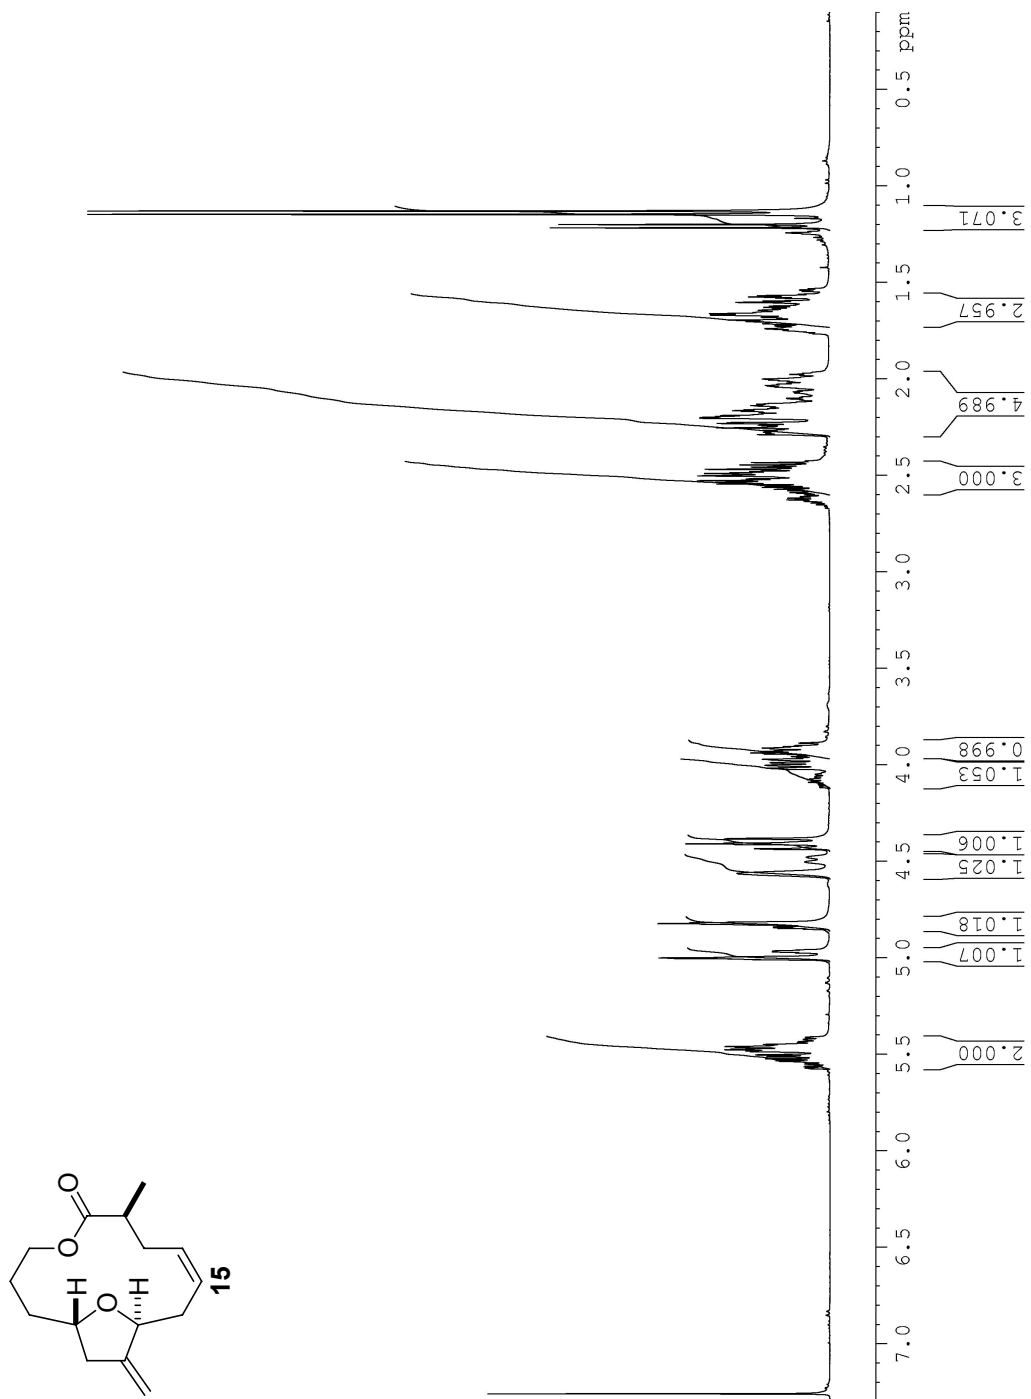

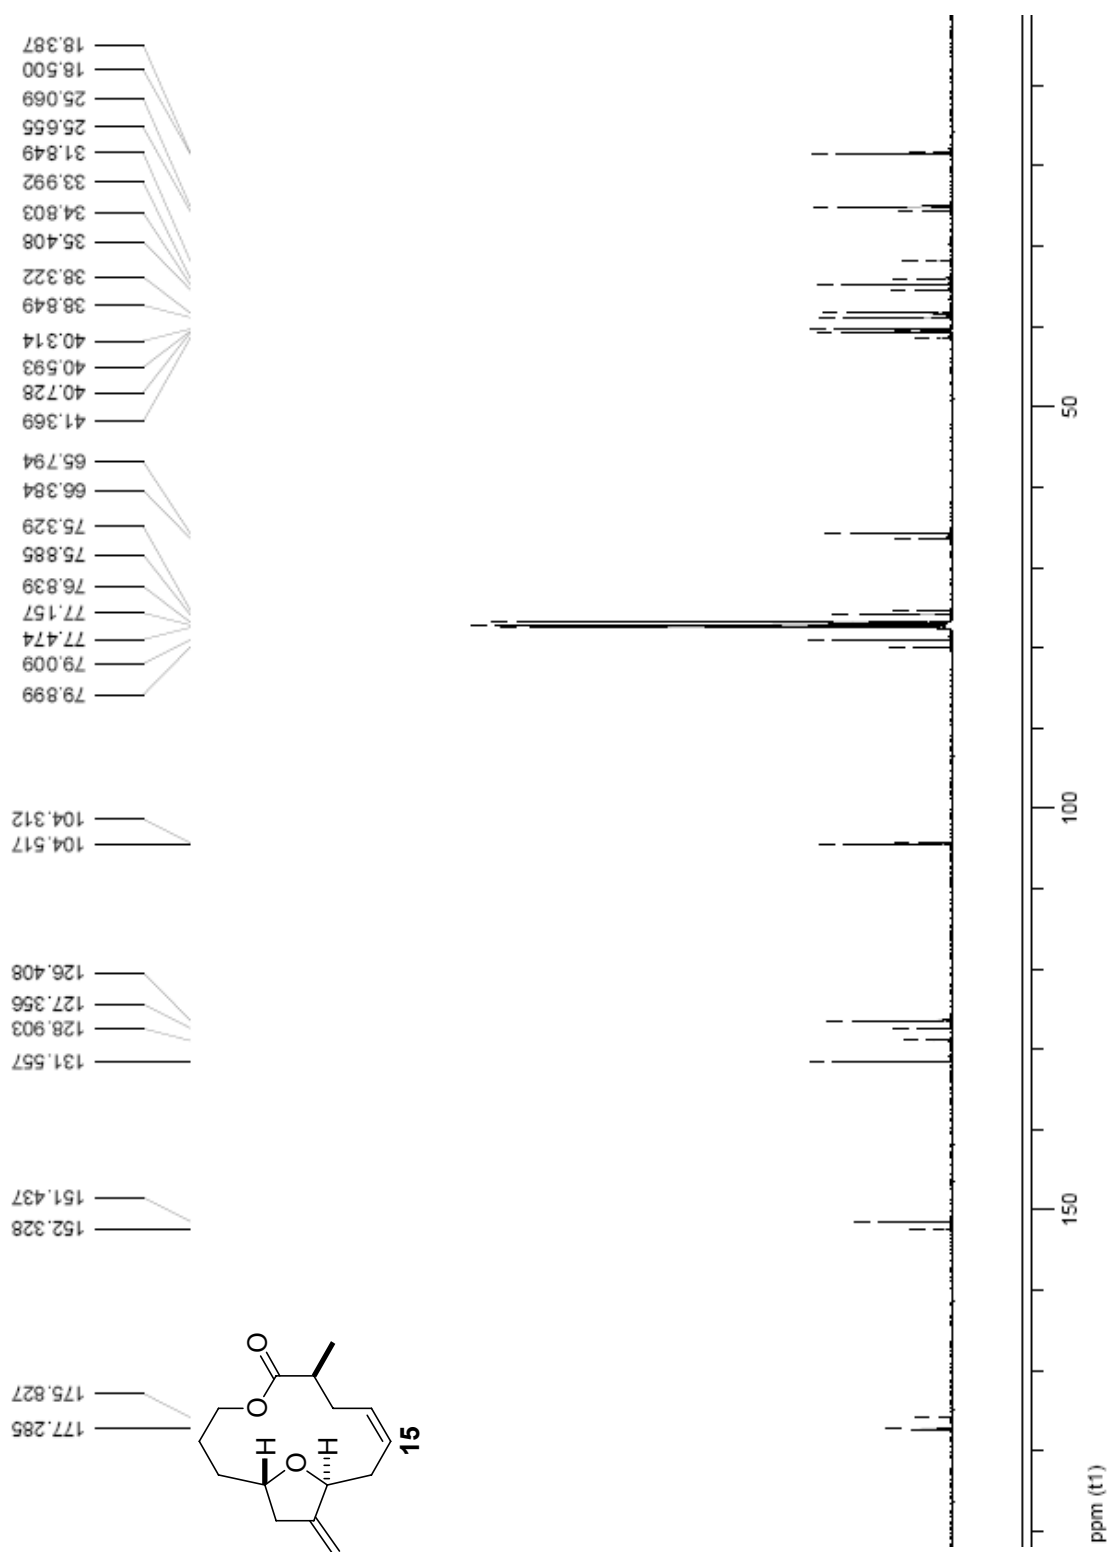



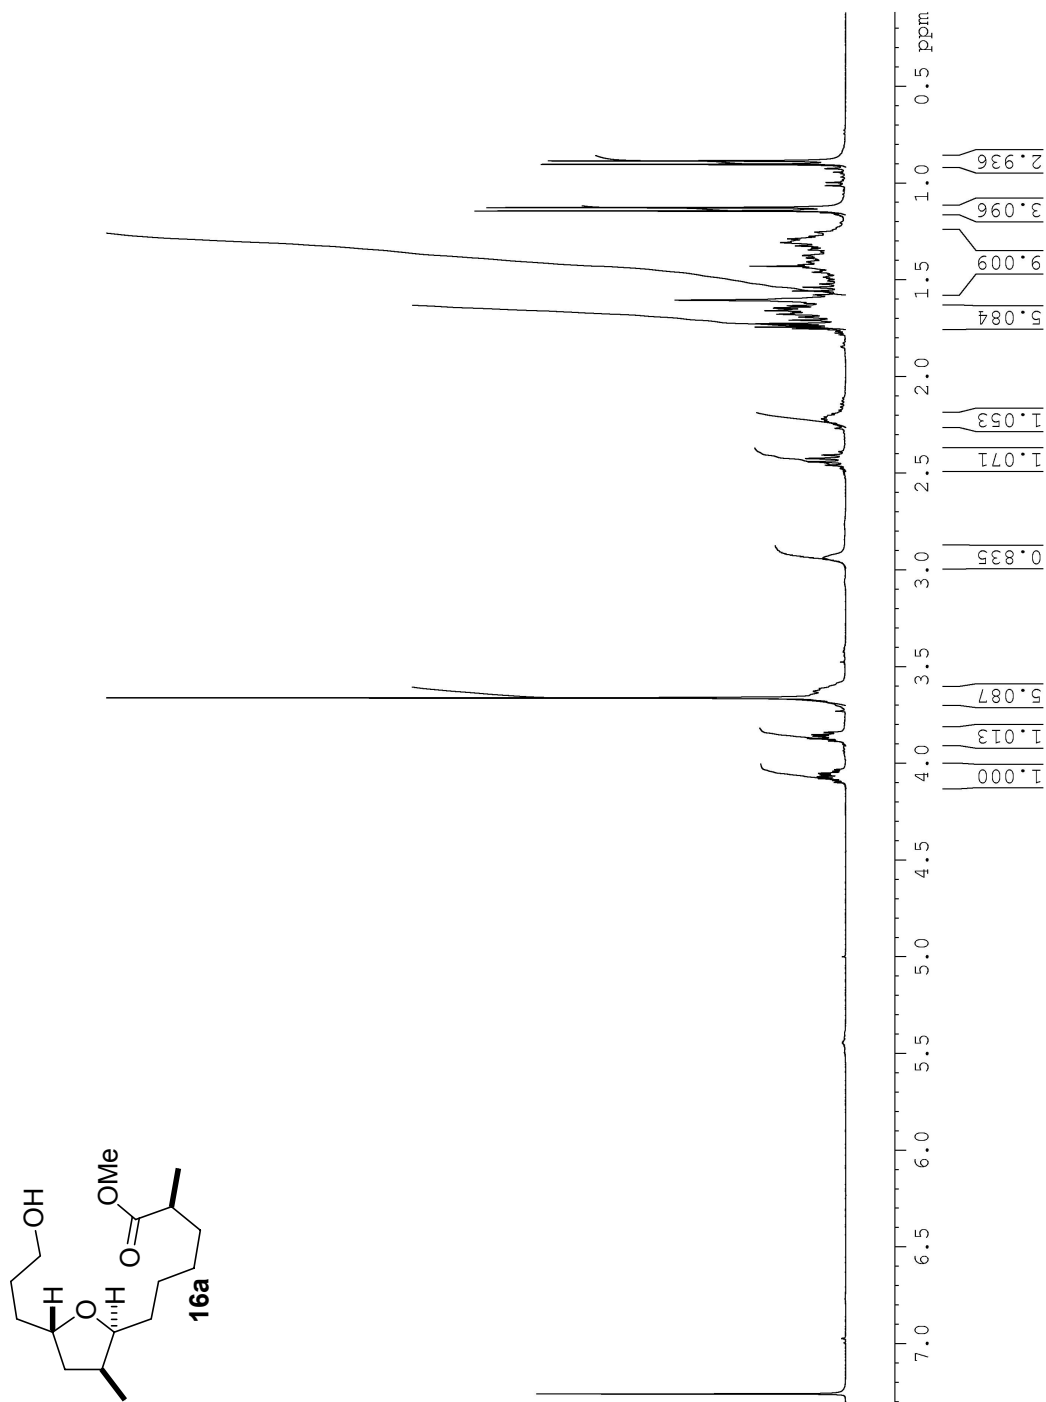

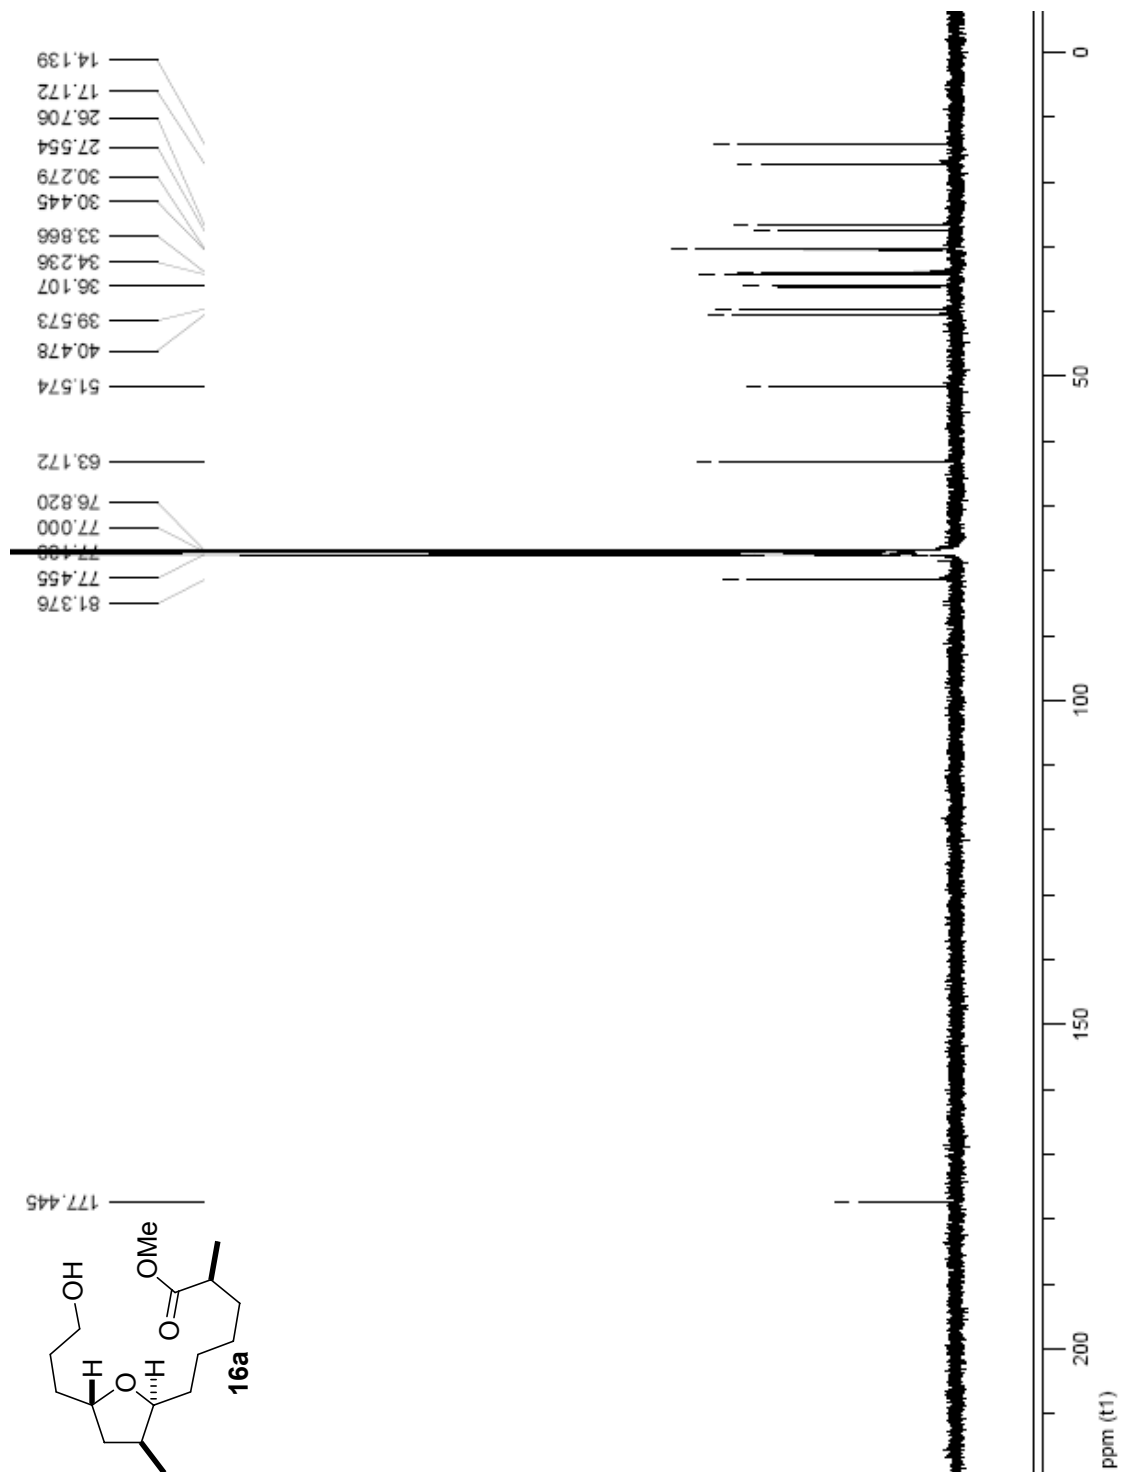

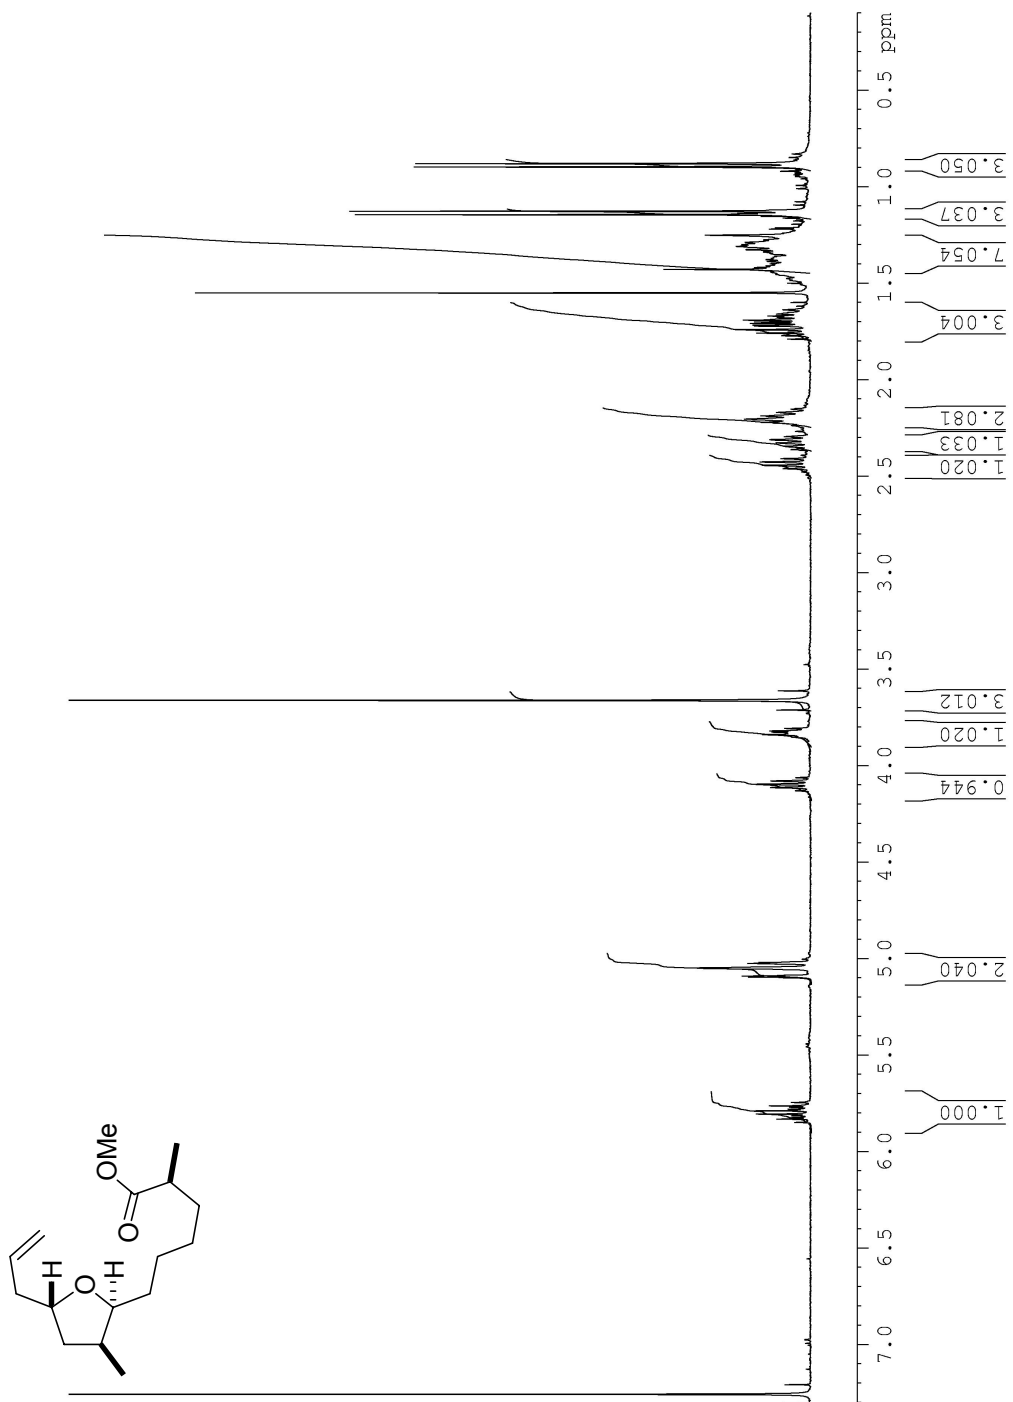

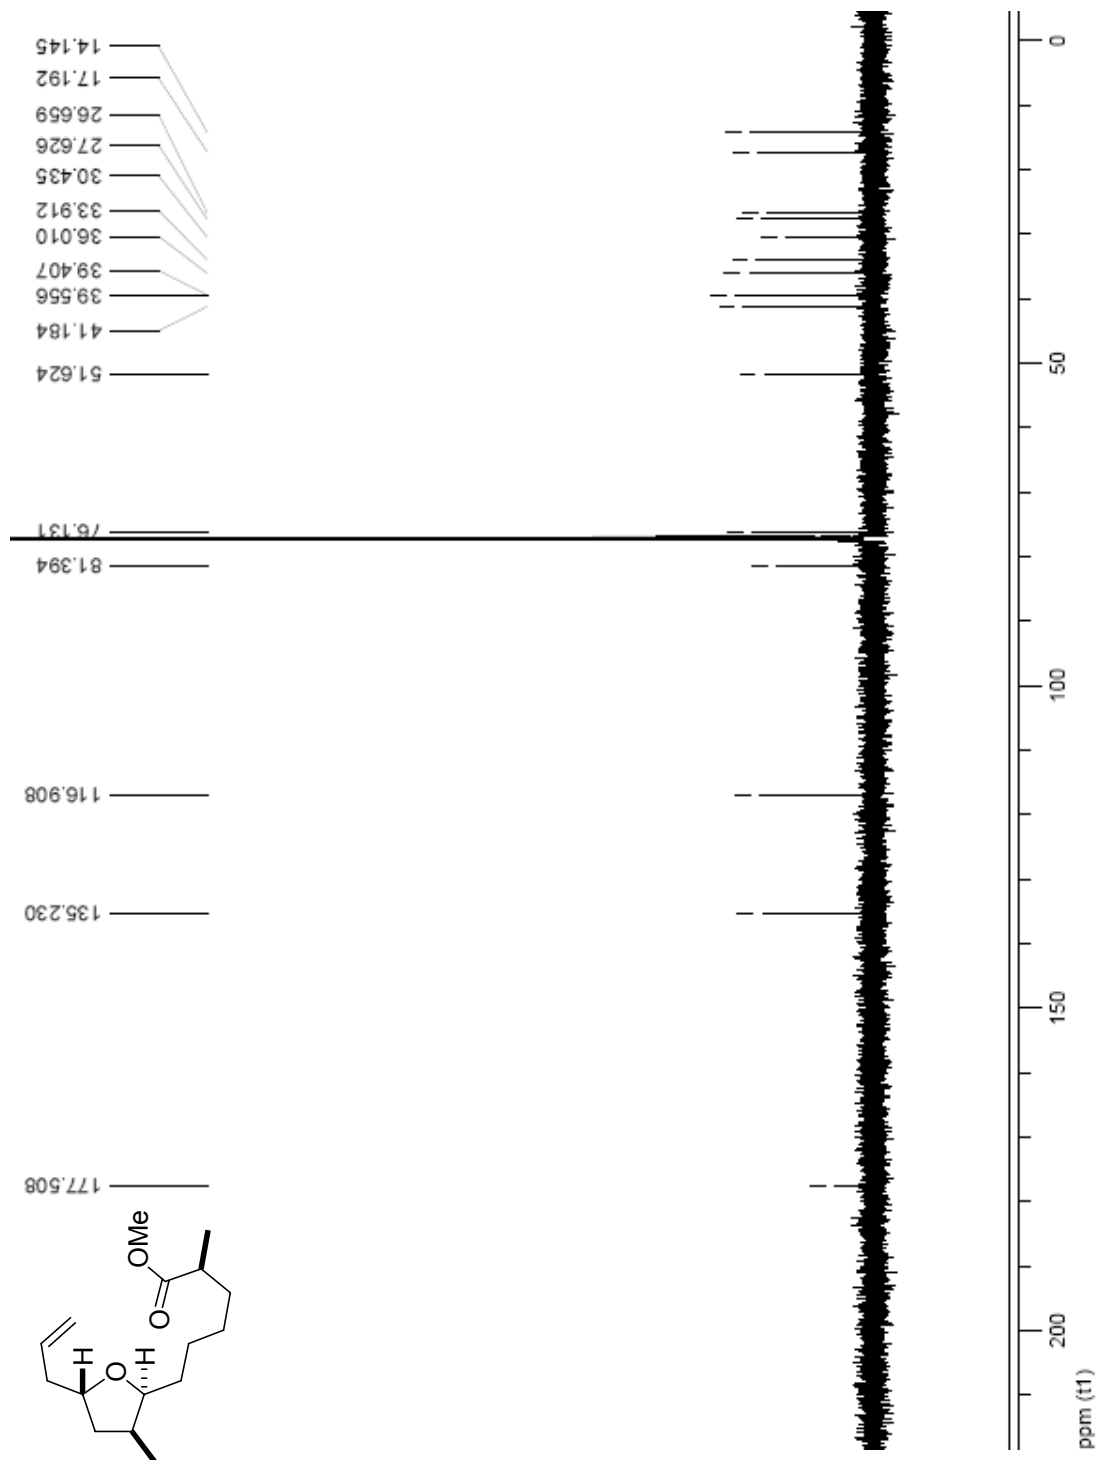

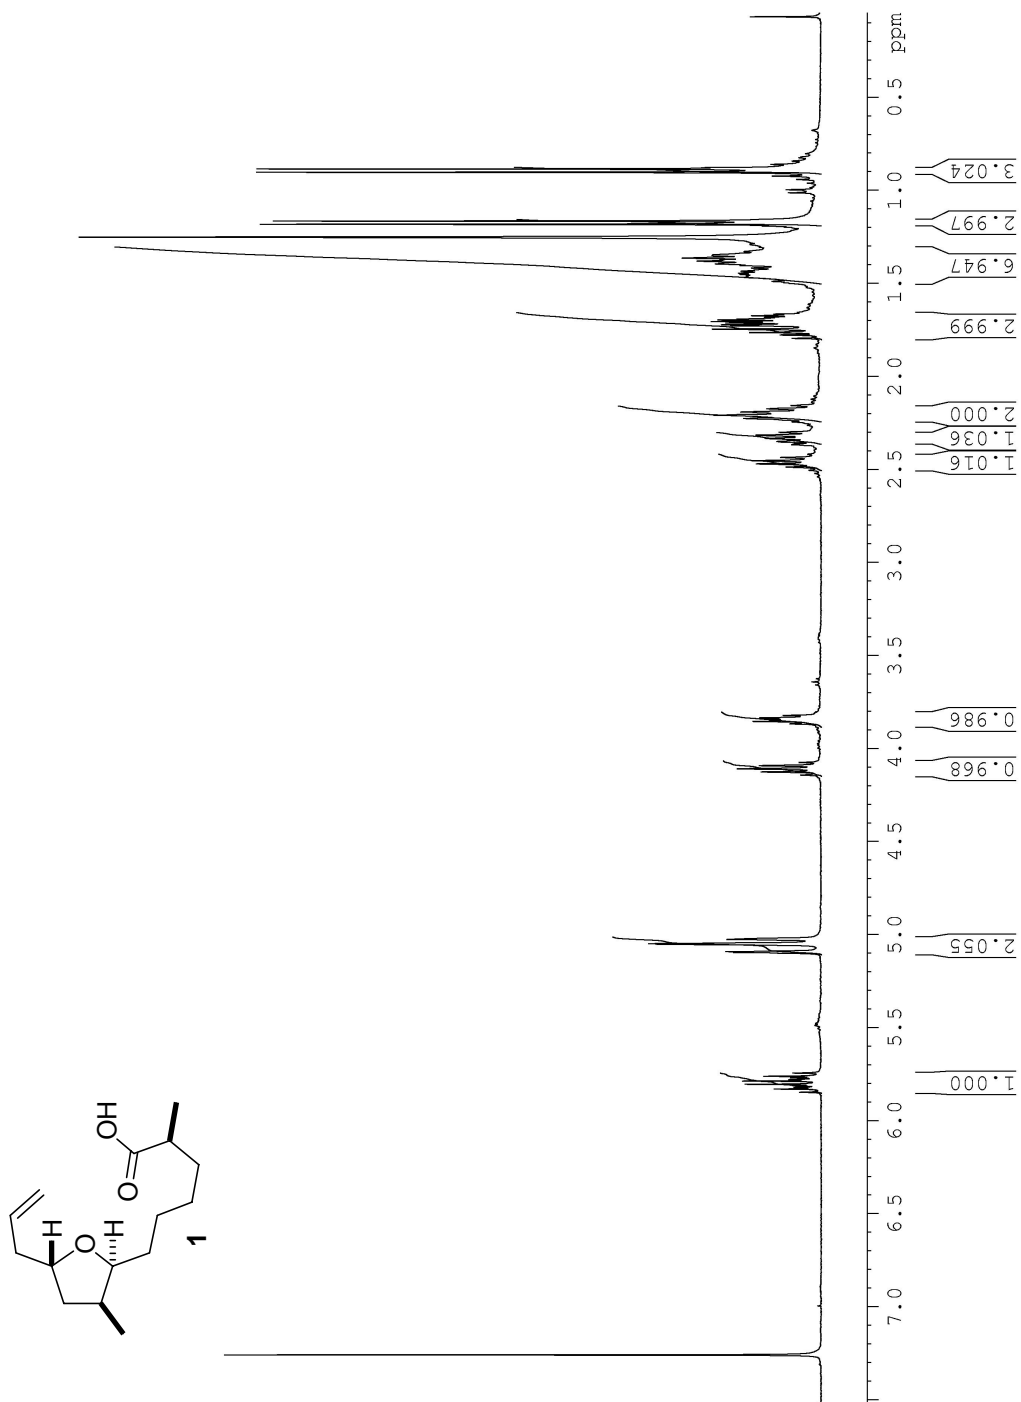

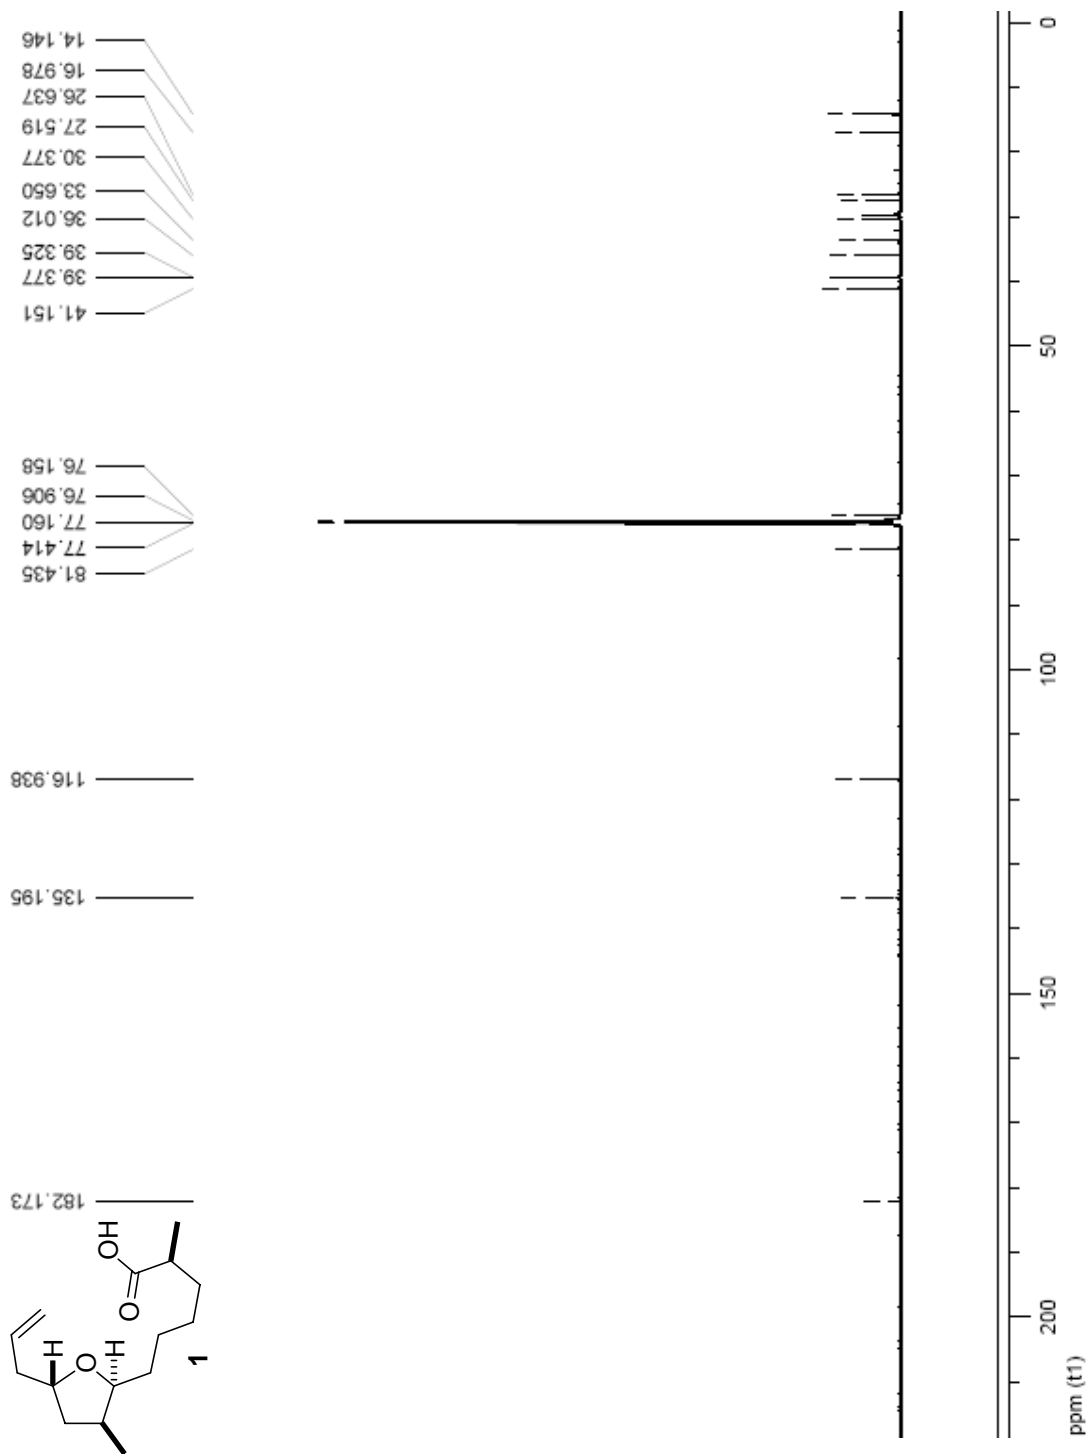

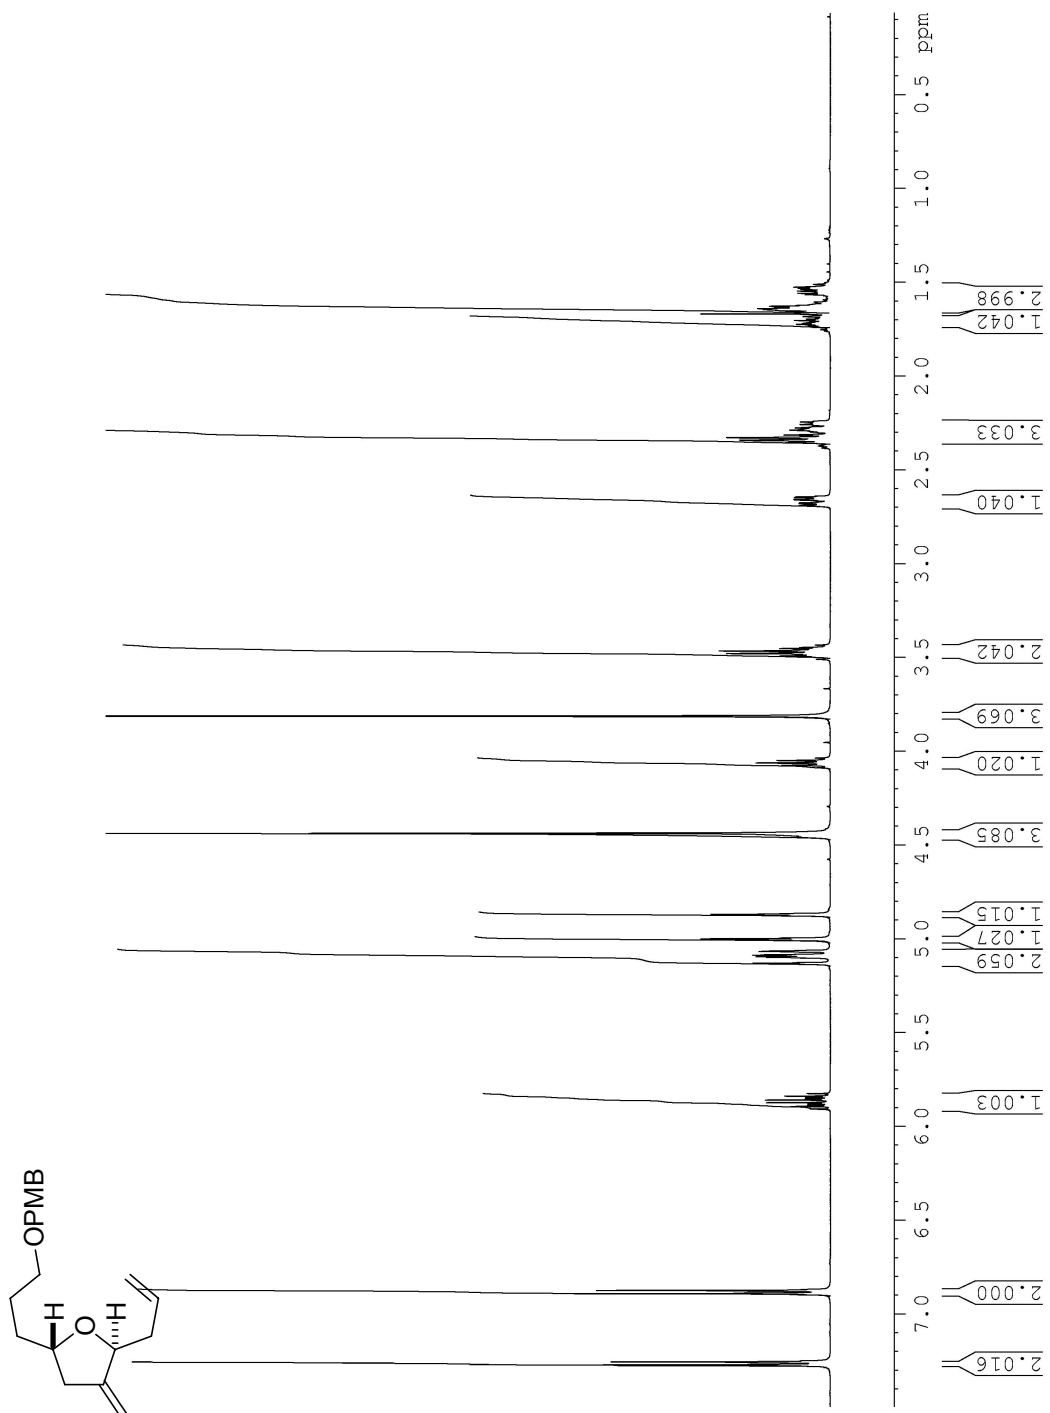

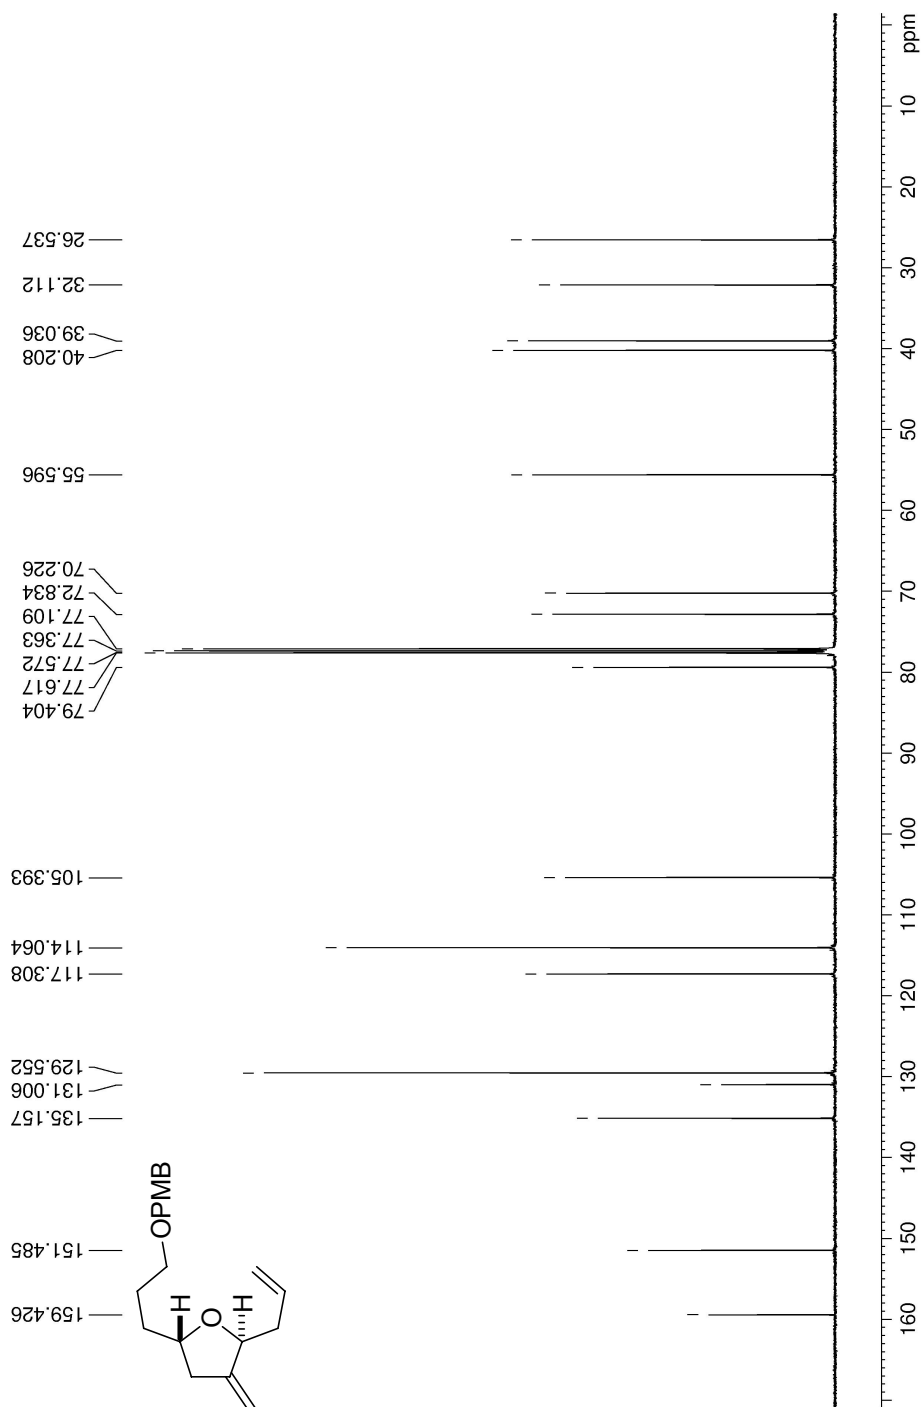



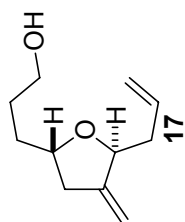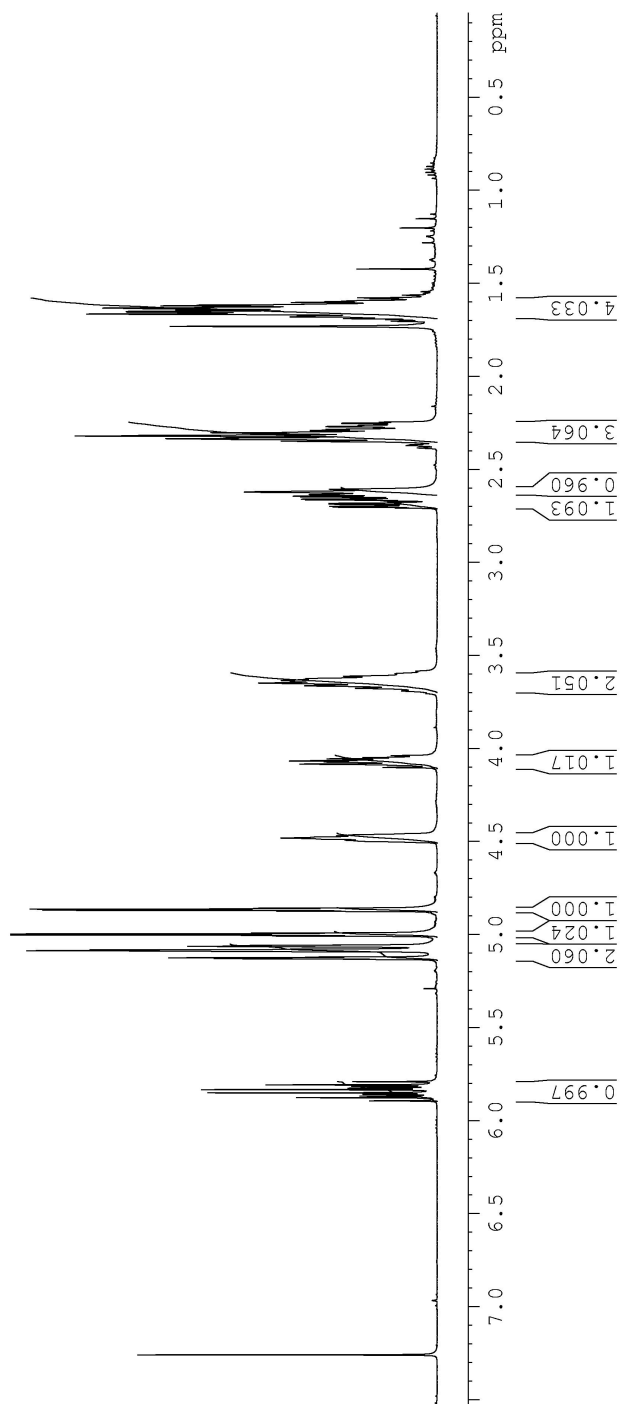

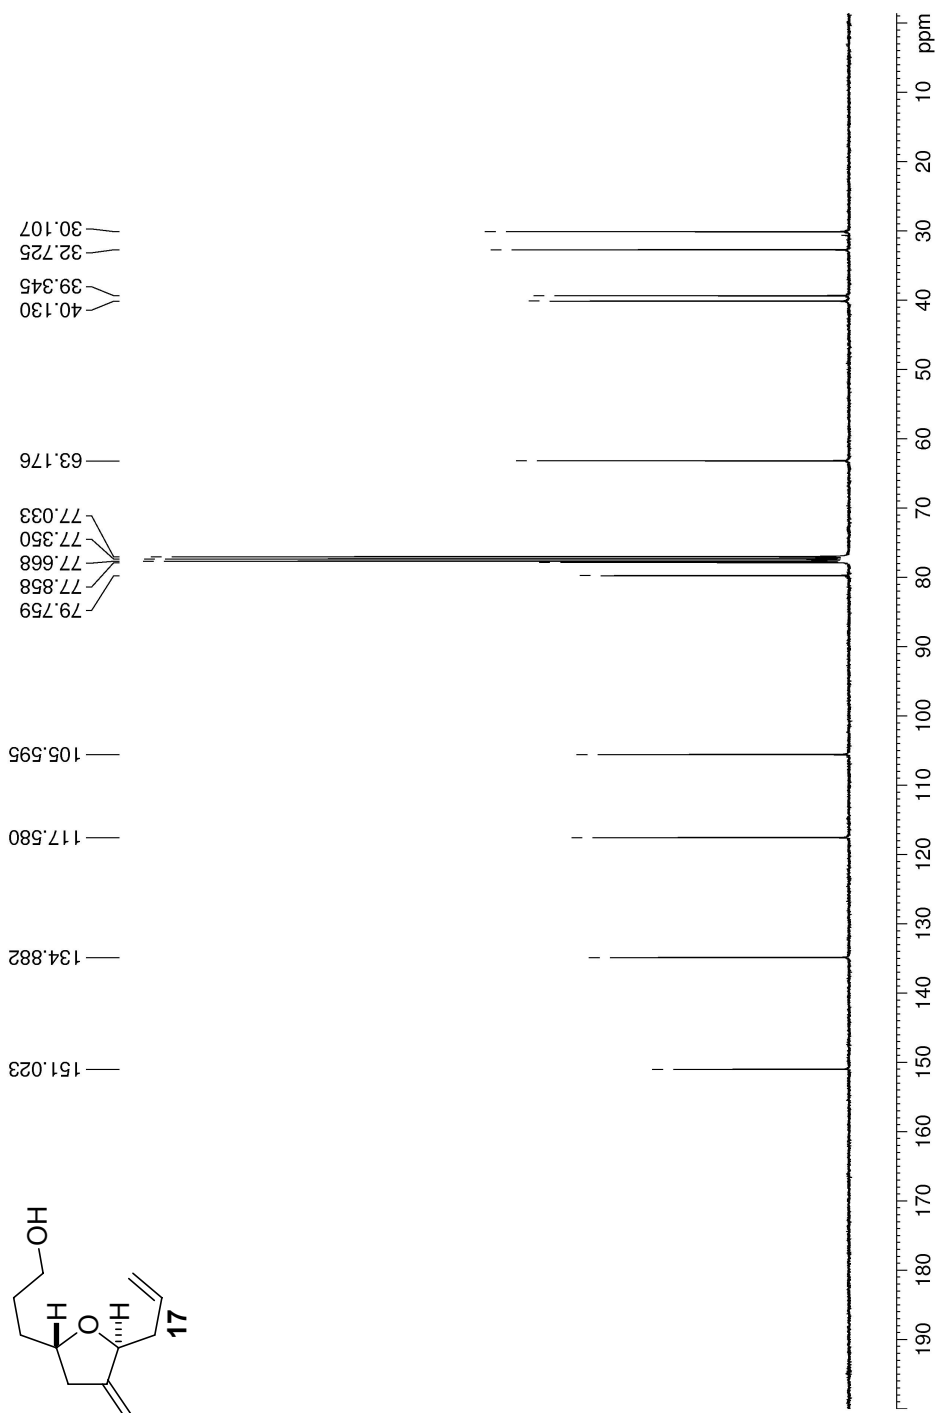

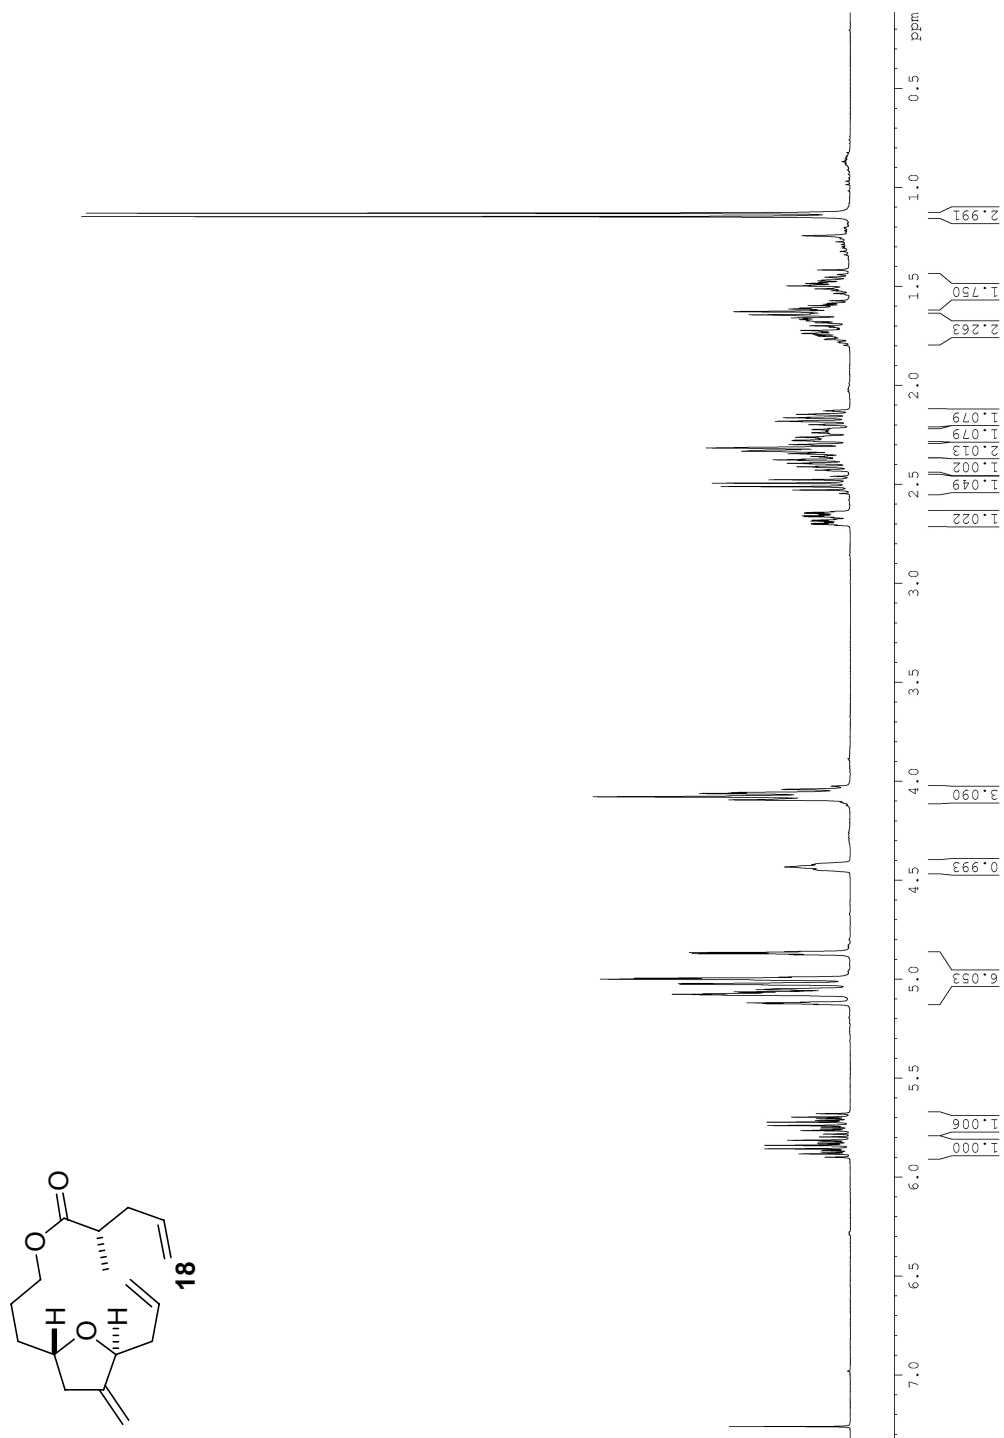

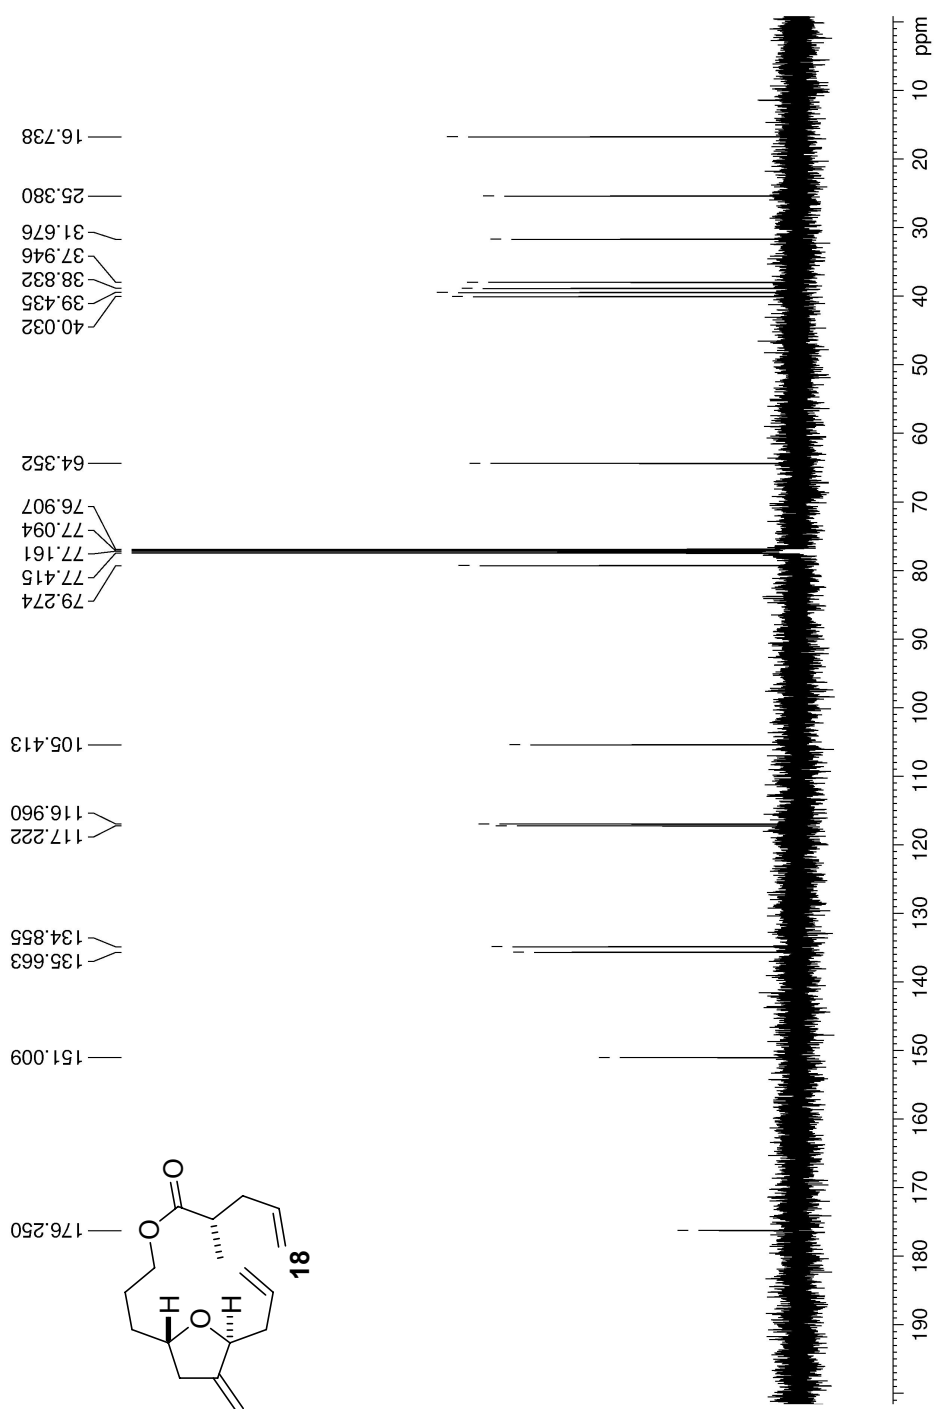

Supplement: c1ob05130j.pdf [file c1ob05130j.pdf]
